# Supplementary material for: The re-emergence of sexually transmissible multidrug resistant Shigella flexneri 3a, England, United Kingdom
Source: Research Square preprint supplement (doi:10.21203/rs.3.rs-3760116/v1), 2024-01-30
Supplement: Supplementary file 1 [file 6606fb4cfd9d97d1fef54576.xlsx]

## Sheet: Supplementary Data 1
Name	ENA Accession	SRA Accession	Lineage	Sub-lineage	Year of isolation	Age	Sex	Travel	Global-BAPS	MSMA-BAPS	t10.1189?	250 SNP CLUSTER	100 SNP CLUSTER	50 SNP CLUSTER	25 SNP CLUSTER	10 SNP CLUSTER	Assembled	aac(6')-lb-cr5	aadA1	aadA16	aadA2	aadA5	acrF	aph(3")-lb	aph(6)-ld	arr-3	blaCMY-4	blaCTX-M-14	blaCTX-M-15	blaEC	blaOXA	blaOXA-1	blaTEM	blaTEM1	blaTEM40	capU	catA1	cdtB	dfrA1	dfrA12	dfrA14	dfrA17	dfrA27	dfrA5	dfrA7	dfrA8	emrE	erm(B)	glpT_E448K
ERS180055	ERS180055	ERR230485	Low-risk region	ND	2008	16-60	M	ND	1	1	ND	ND	ND	ND	ND	ND	Yes		Present											Present		Present					Present										Present		Present
ERS180056	ERS180056	ERR230486	Low-risk region	ND	2008	16-60	M	ND	1	2	ND	ND	ND	ND	ND	ND	Yes		Present											Present		Present					Present										Present		Present
ERS180063	ERS180063	ERR230493	Low-risk region	ND	2008	16-60	M	ND	1	2	ND	ND	ND	ND	ND	ND	Yes		Present											Present		Present				Present	Present										Present		Present
ERS180064	ERS180064	ERR230494	African region	ND	2008	16-60	M	ND	4	ND	ND	ND	ND	ND	ND	ND	Yes							Present	Present					Present				Present		Present					Present						Present		Present
ERS180071	ERS180071	ERR230501	Asian region	ND	2008	16-60	M	ND	3	ND	ND	ND	ND	ND	ND	ND	Yes		Present											Present						Present	Present		Present								Present		Present
ERS180072	ERS180072	ERR230502	Low-risk region	ND	2008	16-60	M	ND	1	4	ND	ND	ND	ND	ND	ND	Yes		Present											Present		Present					Present										Present		Present
ERS180079	ERS180079	ERR230509	Low-risk region	ND	2008	16-60	M	ND	1	2	ND	ND	ND	ND	ND	ND	Yes		Present											Present		Present				Present	Present										Present		Present
ERS180080	ERS180080	ERR230510	Asian region	ND	2008	16-60	M	ND	3	ND	ND	ND	ND	ND	ND	ND	Yes		Present			Present								Present				Present		Present	Present		Present			Present					Present		Present
ERS180087	ERS180087	ERR230517	African region	ND	2008	16-60	M	ND	2	ND	ND	ND	ND	ND	ND	ND	Yes		Present											Present		Present				Present	Present										Present		Present
ERS180088	ERS180088	ERR230518	Low-risk region	ND	2008	16-60	M	ND	1	3	ND	ND	ND	ND	ND	ND	Yes		Present											Present		Present					Present										Present		Present
ERS180095	ERS180095	ERR230525	Low-risk region	ND	2008	16-60	M	ND	1	2	ND	ND	ND	ND	ND	ND	Yes		Present											Present		Present					Present										Present		Present
ERS180096	ERS180096	ERR230526	Low-risk region	ND	2008	16-60	M	ND	1	3	ND	ND	ND	ND	ND	ND	Yes		Present					Present	Present					Present		Present					Present				Present						Present		Present
ERS180103	ERS180103	ERR230533	Low-risk region	ND	2008	16-60	M	ND	1	4	ND	ND	ND	ND	ND	ND	Yes		Present											Present		Present					Present										Present		Present
ERS180111	ERS180111	ERR230541	Low-risk region	ND	2008	16-60	M	ND	1	2	ND	ND	ND	ND	ND	ND	Yes		Present											Present		Present					Present										Present		Present
ERS180119	ERS180119	ERR230549	Low-risk region	ND	2008	16-60	M	ND	1	4	ND	ND	ND	ND	ND	ND	Yes		Present											Present		Present					Present										Present		Present
ERS180127	ERS180127	ERR230557	Low-risk region	ND	2008	16-60	M	ND	1	1	ND	ND	ND	ND	ND	ND	Yes		Present					Present	Present					Present		Present				Present	Present				Present						Present		Present
ERS180135	ERS180135	ERR230565	Low-risk region	ND	2008	16-60	M	ND	1	4	ND	ND	ND	ND	ND	ND	Yes		Present											Present		Present					Present										Present		Present
ERS180143	ERS180143	ERR230573	Low-risk region	ND	2008	16-60	M	ND	1	4	ND	ND	ND	ND	ND	ND	Yes		Present											Present		Present					Present										Present		Present
ERS180057	ERS180057	ERR230487	African region	ND	2009	16-60	M	Africa	2	ND	ND	ND	ND	ND	ND	ND	Yes		Present											Present		Present				Present	Present										Present		Present
ERS180058	ERS180058	ERR230488	African region	ND	2009	16-60	M	None	2	ND	ND	ND	ND	ND	ND	ND	Yes		Present											Present		Present				Present	Present										Present		Present
ERS180065	ERS180065	ERR230495	Low-risk region	ND	2009	16-60	M	Europe	1	2	ND	ND	ND	ND	ND	ND	Yes		Present											Present		Present					Present										Present		Present
ERS180066	ERS180066	ERR230496	Low-risk region	ND	2009	16-60	M	None	1	2	ND	ND	ND	ND	ND	ND	Yes		Present											Present		Present				Present	Present										Present		Present
ERS180073	ERS180073	ERR230503	Asian region	ND	2009	16-60	M	Asia	3	ND	ND	ND	ND	ND	ND	ND	Yes		Present											Present						Present	Present		Present								Present		Present
ERS180074	ERS180074	ERR230504	Low-risk region	ND	2009	16-60	M	None	1	2	ND	ND	ND	ND	ND	ND	Yes		Present											Present		Present				Present	Present										Present		Present
ERS180081	ERS180081	ERR230511	Asian region	ND	2009	16-60	M	Asia	3	ND	ND	ND	ND	ND	ND	ND	Yes		Present											Present						Present	Present		Present								Present		Present
ERS180082	ERS180082	ERR230512	African region	ND	2009	16-60	M	Africa	4	ND	ND	ND	ND	ND	ND	ND	Yes													Present						Present											Present		Present
ERS180089	ERS180089	ERR230519	Low-risk region	ND	2009	16-60	M	None	1	4	ND	ND	ND	ND	ND	ND	Yes		Present											Present		Present				Present	Present										Present		Present
ERS180090	ERS180090	ERR230520	Low-risk region	ND	2009	16-60	M	None	1	2	ND	ND	ND	ND	ND	ND	Yes		Present											Present		Present				Present	Present										Present		Present
ERS180097	ERS180097	ERR230527	African region	ND	2009	16-60	M	Africa	2	ND	ND	ND	ND	ND	ND	ND	Yes		Present					Present	Present					Present		Present				Present	Present				Present						Present		Present
ERS180098	ERS180098	ERR230528	Low-risk region	ND	2009	16-60	M	None	1	3	ND	ND	ND	ND	ND	ND	Yes		Present						Present					Present		Present				Present	Present				Present						Present		Present
ERS180104	ERS180104	ERR230534	African region	ND	2009	16-60	M	Africa	2	ND	ND	ND	ND	ND	ND	ND	Yes		Present											Present		Present				Present	Present										Present		Present
ERS180105	ERS180105	ERR230535	Low-risk region	ND	2009	16-60	M	Europe	1	1	ND	ND	ND	ND	ND	ND	Yes		Present											Present		Present					Present										Present		Present
ERS180106	ERS180106	ERR230536	Low-risk region	ND	2009	16-60	M	Europe	1	3	ND	ND	ND	ND	ND	ND	Yes		Present											Present		Present					Present										Present		Present
ERS180112	ERS180112	ERR230542	African region	ND	2009	16-60	M	Africa	2	ND	ND	ND	ND	ND	ND	ND	Yes													Present						Present											Present		Present
ERS180113	ERS180113	ERR230543	Asian region	ND	2009	16-60	M	Asia	3	ND	ND	ND	ND	ND	ND	ND	Yes		Present											Present						Present	Present		Present								Present		Present
ERS180120	ERS180120	ERR230550	Low-risk region	ND	2009	16-60	M	Europe	1	2	ND	ND	ND	ND	ND	ND	Yes		Present											Present		Present				Present	Present										Present		Present
ERS180121	ERS180121	ERR230551	Low-risk region	ND	2009	16-60	M	None	1	2	ND	ND	ND	ND	ND	ND	Yes		Present											Present		Present					Present										Present		Present
ERS180128	ERS180128	ERR230558	African region	ND	2009	16-60	M	Africa	2	ND	ND	ND	ND	ND	ND	ND	Yes		Present					Present	Present					Present		Present				Present	Present				Present						Present		Present
ERS180129	ERS180129	ERR230559	African region	ND	2009	16-60	M	Africa	2	ND	ND	ND	ND	ND	ND	ND	Yes		Present					Present	Present					Present		Present				Present	Present				Present						Present		Present
ERS180136	ERS180136	ERR230566	Asian region	ND	2009	16-60	M	Asia	3	ND	ND	ND	ND	ND	ND	ND	Yes		Present											Present						Present	Present		Present								Present		Present
ERS180137	ERS180137	ERR230567	Low-risk region	ND	2009	16-60	M	None	1	3	ND	ND	ND	ND	ND	ND	Yes		Present					Present	Present					Present		Present				Present	Present				Present						Present		Present
ERS180144	ERS180144	ERR230574	Low-risk region	ND	2009	16-60	M	None	1	4	ND	ND	ND	ND	ND	ND	Yes		Present											Present		Present					Present										Present		Present
ERS180145	ERS180145	ERR230575	Low-risk region	ND	2009	16-60	M	None	1	3	ND	ND	ND	ND	ND	ND	Yes		Present					Present	Present					Present		Present					Present				Present						Present		Present
ERS369458	ERS369458	ERR448991	Low-risk region	ND	2009	16-60	F	None	1	2	ND	ND	ND	ND	ND	ND	Yes		Present											Present		Present				Present	Present										Present		Present
ERS369472	ERS369472	ERR449005	Low-risk region	A	2011	16-60	F	None	1	1	ND	ND	ND	ND	ND	ND	Yes		Present											Present		Present					Present										Present		Present
ERS180059	ERS180059	ERR230489	Low-risk region	ND	2010	16-60	M	None	1	2	ND	ND	ND	ND	ND	ND	Yes		Present											Present		Present				Present	Present										Present		Present
ERS180060	ERS180060	ERR230490	Asian region	ND	2010	16-60	M	None	3	ND	ND	ND	ND	ND	ND	ND	Yes		Present											Present						Present	Present		Present								Present		Present
ERS180067	ERS180067	ERR230497	Low-risk region	ND	2010	16-60	M	None	1	2	ND	ND	ND	ND	ND	ND	Yes		Present											Present		Present					Present										Present		Present
ERS180068	ERS180068	ERR230498	Asian region	ND	2010	16-60	M	Asia	3	ND	ND	ND	ND	ND	ND	ND	Yes		Present											Present						Present	Present		Present								Present		Present
ERS180075	ERS180075	ERR230505	Low-risk region	ND	2010	16-60	M	Europe	1	4	ND	ND	ND	ND	ND	ND	Yes		Present											Present		Present				Present	Present										Present		Present
ERS180076	ERS180076	ERR230506	Low-risk region	ND	2010	16-60	M	None	1	3	ND	ND	ND	ND	ND	ND	Yes		Present					Present	Present					Present		Present				Present	Present				Present						Present		Present
ERS180083	ERS180083	ERR230513	Low-risk region	ND	2010	16-60	M	None	1	3	ND	ND	ND	ND	ND	ND	Yes		Present		Present			Present	Present					Present		Present					Present			Present	Present						Present		Present
ERS180084	ERS180084	ERR230514	African region	ND	2010	16-60	M	Asia	5	ND	ND	ND	ND	ND	ND	ND	Yes		Present					Present	Present					Present		Present				Present	Present		Present								Present		Present
ERS180091	ERS180091	ERR230521	Asian region	ND	2010	16-60	M	Europe	3	ND	ND	ND	ND	ND	ND	ND	Yes		Present											Present						Present	Present		Present								Present		Present
ERS180092	ERS180092	ERR230522	Low-risk region	B	2010	16-60	M	None	1	3	ND	ND	ND	ND	ND	ND	Yes		Present											Present		Present				Present	Present										Present		Present
ERS180099	ERS180099	ERR230529	Low-risk region	ND	2010	16-60	M	None	1	3	ND	ND	ND	ND	ND	ND	Yes		Present					Present	Present					Present		Present					Present				Present						Present		Present
ERS180100	ERS180100	ERR230530	Low-risk region	C	2010	16-60	M	None	1	3	ND	ND	ND	ND	ND	ND	Yes		Present					Present	Present					Present		Present				Present	Present				Present						Present		Present
ERS180107	ERS180107	ERR230537	Low-risk region	ND	2010	16-60	M	None	1	3	ND	ND	ND	ND	ND	ND	Yes		Present											Present		Present				Present	Present										Present		Present
ERS180108	ERS180108	ERR230538	Asian region	ND	2010	16-60	M	Asia	3	ND	ND	ND	ND	ND	ND	ND	Yes		Present											Present						Present	Present		Present								Present		Present
ERS180114	ERS180114	ERR230544	Low-risk region	ND	2010	16-60	M	None	1	3	ND	ND	ND	ND	ND	ND	Yes		Present											Present		Present				Present	Present										Present		Present
ERS180115	ERS180115	ERR230545	Low-risk region	ND	2010	16-60	M	None	1	3	ND	ND	ND	ND	ND	ND	Yes		Present					Present	Present					Present		Present					Present				Present						Present		Present
ERS180116	ERS180116	ERR230546	Low-risk region	ND	2010	16-60	M	None	1	2	ND	ND	ND	ND	ND	ND	Yes		Present											Present		Present					Present										Present		Present
ERS180122	ERS180122	ERR230552	Low-risk region	ND	2010	16-60	M	None	1	3	ND	ND	ND	ND	ND	ND	Yes		Present											Present		Present					Present										Present		Present
ERS180123	ERS180123	ERR230553	Low-risk region	ND	2010	16-60	M	None	1	2	ND	ND	ND	ND	ND	ND	Yes		Present											Present		Present					Present										Present		Present
ERS180124	ERS180124	ERR230554	Low-risk region	ND	2010	16-60	M	Europe	1	2	ND	ND	ND	ND	ND	ND	Yes		Present											Present		Present					Present										Present		Present
ERS180130	ERS180130	ERR230560	Low-risk region	ND	2010	16-60	M	None	1	2	ND	ND	ND	ND	ND	ND	Yes		Present											Present		Present					Present										Present		Present
ERS180131	ERS180131	ERR230561	Low-risk region	ND	2010	16-60	M	South America	1	2	ND	ND	ND	ND	ND	ND	Yes		Present											Present		Present				Present	Present										Present		Present
ERS180132	ERS180132	ERR230562	Low-risk region	ND	2010	16-60	M	None	1	3	ND	ND	ND	ND	ND	ND	Yes							Present	Present					Present											Present						Present		Present
ERS180138	ERS180138	ERR230568	Low-risk region	ND	2010	16-60	M	None	1	3	ND	ND	ND	ND	ND	ND	Yes		Present											Present		Present				Present	Present										Present		Present
ERS180139	ERS180139	ERR230569	Low-risk region	ND	2010	16-60	M	None	1	2	ND	ND	ND	ND	ND	ND	Yes		Present											Present		Present					Present										Present		Present
ERS180146	ERS180146	ERR230576	Low-risk region	ND	2010	16-60	M	None	1	3	ND	ND	ND	ND	ND	ND	Yes		Present					Present	Present					Present		Present					Present				Present						Present		Present
ERS180147	ERS180147	ERR230577	Low-risk region	ND	2010	16-60	M	None	1	1	ND	ND	ND	ND	ND	ND	Yes		Present											Present		Present					Present										Present		Present
ERS369460	ERS369460	ERR448993	Low-risk region	ND	2010	16-60	M	ND	1	4	ND	ND	ND	ND	ND	ND	Yes		Present											Present		Present				Present	Present										Present		Present
ERS369461	ERS369461	ERR448994	Low-risk region	ND	2010	16-60	M	ND	1	3	ND	ND	ND	ND	ND	ND	Yes		Present		Present									Present		Present				Present	Present			Present							Present		Present
ERS369462	ERS369462	ERR448995	Low-risk region	ND	2010	16-60	M	ND	1	3	ND	ND	ND	ND	ND	ND	Yes		Present		Present			Present	Present					Present		Present					Present			Present	Present						Present		Present
ERS369496	ERS369496	ERR449077	Low-risk region	C	2012	16-60	F	ND	1	3	ND	ND	ND	ND	ND	ND	Yes		Present					Present	Present					Present		Present		Present		Present	Present				Present						Present	Present	Present
ERS369468	ERS369468	ERR449001	Low-risk region	A	2010	16-60	M	ND	1	1	ND	ND	ND	ND	ND	ND	Yes		Present											Present		Present				Present	Present										Present		Present
ERS369470	ERS369470	ERR449003	Low-risk region	ND	2010	16-60	M	ND	1	3	ND	ND	ND	ND	ND	ND	Yes		Present					Present	Present					Present		Present				Present	Present				Present						Present		Present
ERS180061	ERS180061	ERR230491	Low-risk region	B	2011	16-60	M	None	1	3	ND	ND	ND	ND	ND	ND	Yes		Present											Present		Present				Present	Present										Present		Present
ERS180069	ERS180069	ERR230499	Asian region	ND	2011	16-60	M	Asia	3	ND	ND	ND	ND	ND	ND	ND	Yes		Present											Present						Present	Present		Present								Present		Present
ERS180070	ERS180070	ERR230500	Low-risk region	ND	2011	16-60	M	None	1	3	ND	ND	ND	ND	ND	ND	Yes		Present											Present		Present					Present										Present		Present
ERS180077	ERS180077	ERR230507	Low-risk region	ND	2011	16-60	M	None	1	3	ND	ND	ND	ND	ND	ND	Yes		Present					Present	Present					Present		Present				Present	Present				Present						Present		Present
ERS180078	ERS180078	ERR230508	Low-risk region	ND	2011	16-60	M	Europe	1	3	ND	ND	ND	ND	ND	ND	Yes		Present											Present		Present					Present										Present		Present
ERS180085	ERS180085	ERR230515	Low-risk region	ND	2011	16-60	M	Europe	1	4	ND	ND	ND	ND	ND	ND	Yes		Present											Present		Present				Present	Present										Present		Present
ERS180086	ERS180086	ERR230516	Asian region	ND	2011	16-60	M	Asia	3	ND	ND	ND	ND	ND	ND	ND	Yes		Present											Present						Present	Present		Present								Present		Present
ERS180093	ERS180093	ERR230523	Low-risk region	ND	2011	16-60	M	None	1	3	ND	ND	ND	ND	ND	ND	Yes		Present											Present		Present				Present	Present										Present		Present
ERS180094	ERS180094	ERR230524	Low-risk region	ND	2011	16-60	M	None	1	3	ND	ND	ND	ND	ND	ND	Yes		Present					Present	Present					Present		Present					Present				Present						Present		Present
ERS180101	ERS180101	ERR230531	Low-risk region	ND	2011	16-60	M	None	1	3	ND	ND	ND	ND	ND	ND	Yes		Present											Present		Present				Present	Present										Present		Present
ERS180102	ERS180102	ERR230532	Low-risk region	ND	2011	16-60	M	None	1	3	ND	ND	ND	ND	ND	ND	Yes		Present											Present		Present				Present	Present										Present		Present
ERS180109	ERS180109	ERR230539	Asian region	ND	2011	16-60	M	None	3	ND	ND	ND	ND	ND	ND	ND	Yes		Present											Present						Present	Present		Present								Present		Present
ERS180110	ERS180110	ERR230540	Low-risk region	C	2011	16-60	M	None	1	3	ND	ND	ND	ND	ND	ND	Yes		Present						Present					Present		Present		Present			Present				Present						Present	Present	Present
ERS180117	ERS180117	ERR230547	Low-risk region	C	2011	16-60	M	None	1	3	ND	ND	ND	ND	ND	ND	Yes		Present											Present		Present				Present	Present										Present		Present
ERS180118	ERS180118	ERR230548	Low-risk region	A	2011	16-60	M	None	1	1	ND	ND	ND	ND	ND	ND	Yes		Present											Present		Present					Present										Present		Present
ERS180125	ERS180125	ERR230555	Asian region	ND	2011	16-60	M	Asia	3	ND	ND	ND	ND	ND	ND	ND	Yes													Present						Present											Present		Present
ERS180126	ERS180126	ERR230556	Asian region	ND	2011	16-60	M	Asia	3	ND	ND	ND	ND	ND	ND	ND	Yes		Present											Present						Present	Present		Present								Present		Present
ERS180133	ERS180133	ERR230563	Low-risk region	A	2011	16-60	M	None	1	1	ND	ND	ND	ND	ND	ND	Yes		Present											Present		Present					Present										Present		Present
ERS180134	ERS180134	ERR230564	Low-risk region	ND	2011	16-60	M	None	1	4	ND	ND	ND	ND	ND	ND	Yes		Present											Present		Present				Present	Present										Present		Present
ERS180140	ERS180140	ERR230570	Low-risk region	ND	2011	16-60	M	None	1	3	ND	ND	ND	ND	ND	ND	Yes		Present											Present		Present					Present										Present		Present
ERS180141	ERS180141	ERR230571	Low-risk region	C	2011	16-60	M	None	1	3	ND	ND	ND	ND	ND	ND	Yes		Present					Present	Present					Present		Present		Present			Present				Present						Present	Present	Present
ERS180142	ERS180142	ERR230572	Low-risk region	B	2011	16-60	M	None	1	3	ND	ND	ND	ND	ND	ND	Yes		Present											Present		Present				Present	Present										Present		Present
ERS180148	ERS180148	ERR230578	Low-risk region	C	2011	16-60	M	None	1	3	ND	ND	ND	ND	ND	ND	Yes		Present					Present	Present					Present		Present				Present	Present				Present						Present		Present
ERS180149	ERS180149	ERR230579	African region	ND	2011	16-60	M	Africa	2	ND	ND	ND	ND	ND	ND	ND	Yes		Present					Present	Present					Present		Present				Present	Present				Present						Present		Present
ERS180150	ERS180150	ERR230580	Low-risk region	ND	2011	16-60	M	None	1	3	ND	ND	ND	ND	ND	ND	Yes		Present					Present	Present					Present		Present				Present	Present				Present						Present		Present
SRR7191558	ND	SRR7191558	ND	ND	2017	16-60	F	None	1	1	No	66	224	381	576	681	No	ND	ND	ND	ND	ND	ND	ND	ND	ND	ND	ND	ND	ND	ND	ND	ND	ND	ND	ND	ND	ND	ND	ND	ND	ND	ND	ND	ND	ND	ND	ND	ND
ERS369475	ERS369475	ERR449008	Low-risk region	ND	2011	16-60	M	None	1	3	ND	ND	ND	ND	ND	ND	Yes		Present											Present		Present				Present	Present										Present		Present
SRR7290923	ND	SRR7290923	ND	ND	2017	16-60	F	ND	1	1	No	35	43	43	43	43	Yes		Present											Present		Present		Present			Present										Present		Present
SRR10294290	ND	SRR10294290	ND	ND	2019	16-60	F	ND	1	5	Yes	35	43	43	43	1189	Yes		Present											Present		Present					Present										Present		Present
SRR11215216	ND	SRR11215216	ND	ND	2020	16-60	F	ND	1	5	Yes	35	43	43	43	1189	Yes		Present											Present		Present				Present	Present										Present		Present
SRR11361776	ND	SRR11361776	ND	ND	2020	16-60	F	South America	1	4	No	35	43	766	1099	1942	Yes		Present					Present	Present					Present		Present					Present				Present						Present		Present
ERS369493	ERS369493	ERR449025	Low-risk region	C	2012	16-60	M	ND	1	3	ND	ND	ND	ND	ND	ND	Yes		Present					Present	Present					Present		Present		Present		Present	Present				Present						Present	Present	Present
ERS369494	ERS369494	ERR449026	Low-risk region	C	2012	16-60	M	ND	1	3	ND	ND	ND	ND	ND	ND	Yes		Present					Present	Present					Present		Present		Present			Present				Present						Present	Present	Present
ERS369495	ERS369495	ERR449027	Low-risk region	A	2012	16-60	M	None	1	1	ND	ND	ND	ND	ND	ND	Yes		Present											Present		Present		Present		Present	Present										Present	Present	Present
SRR11657090	ND	SRR11657090	ND	ND	2020	16-60	F	ND	1	5	Yes	35	43	43	43	1189	Yes		Present											Present		Present					Present										Present	Present	Present
ERS369497	ERS369497	ERR449078	Low-risk region	B	2012	16-60	M	ND	1	3	ND	ND	ND	ND	ND	ND	Yes		Present											Present		Present				Present	Present										Present		Present
ERS369498	ERS369498	ERR449028	Low-risk region	ND	2012	16-60	M	ND	1	3	ND	ND	ND	ND	ND	ND	Yes		Present											Present		Present				Present	Present										Present		Present
ERS369499	ERS369499	ERR449029	African region	ND	2012	16-60	M	Africa	2	ND	ND	ND	ND	ND	ND	ND	Yes		Present					Present	Present					Present		Present				Present	Present				Present						Present		Present
ERS369500	ERS369500	ERR449030	Low-risk region	ND	2012	16-60	M	ND	1	4	ND	ND	ND	ND	ND	ND	Yes		Present											Present		Present				Present	Present										Present		Present
ERS369501	ERS369501	ERR449031	Low-risk region	C	2012	16-60	M	None	1	3	ND	ND	ND	ND	ND	ND	Yes		Present											Present		Present		Present		Present	Present										Present	Present	Present
ERS369502	ERS369502	ERR449032	Asian region	ND	2012	16-60	M	Asia	3	ND	ND	ND	ND	ND	ND	ND	Yes		Present											Present						Present	Present		Present								Present		Present
ERS369503	ERS369503	ERR449033	Low-risk region	C	2012	ND	M	None	1	3	ND	ND	ND	ND	ND	ND	Yes		Present											Present		Present		Present		Present	Present										Present		Present
ERS369504	ERS369504	ERR449034	Low-risk region	B	2012	16-60	M	ND	1	3	ND	ND	ND	ND	ND	ND	Yes		Present			Present								Present				Present								Present					Present	Present	Present
ERS369505	ERS369505	ERR449035	Low-risk region	B	2012	ND	M	ND	1	3	ND	ND	ND	ND	ND	ND	Yes		Present			Present								Present				Present		Present						Present					Present	Present	Present
ERS369506	ERS369506	ERR449036	Low-risk region	B	2012	16-60	M	ND	1	3	ND	ND	ND	ND	ND	ND	Yes		Present			Present								Present				Present								Present					Present	Present	Present
ERS369507	ERS369507	ERR449037	Low-risk region	C	2012	16-60	M	ND	1	3	ND	ND	ND	ND	ND	ND	Yes		Present											Present		Present		Present		Present	Present										Present	Present	Present
ERS369508	ERS369508	ERR449038	Low-risk region	A	2012	16-60	M	ND	1	1	ND	ND	ND	ND	ND	ND	Yes		Present											Present		Present				Present	Present										Present		Present
ERS369509	ERS369509	ERR449039	Low-risk region	A	2012	16-60	M	None	1	1	ND	ND	ND	ND	ND	ND	Yes		Present											Present		Present		Present			Present										Present	Present	Present
ERS369510	ERS369510	ERR449040	Asian region	ND	2012	16-60	M	ND	3	ND	ND	ND	ND	ND	ND	ND	Yes		Present											Present						Present	Present		Present								Present		Present
ERS369511	ERS369511	ERR449041	Low-risk region	A	2012	16-60	M	ND	1	1	ND	ND	ND	ND	ND	ND	Yes		Present											Present		Present		Present			Present										Present	Present	Present
ERS369512	ERS369512	ERR449042	African region	ND	2012	16-60	M	Africa	4	ND	ND	ND	ND	ND	ND	ND	Yes		Present											Present		Present				Present	Present										Present		Present
ERS369513	ERS369513	ERR449043	Low-risk region	A	2012	16-60	M	None	1	1	ND	ND	ND	ND	ND	ND	Yes		Present											Present		Present		Present			Present										Present	Present	Present
ERS369514	ERS369514	ERR449044	Low-risk region	A	2012	16-60	M	None	1	1	ND	ND	ND	ND	ND	ND	Yes		Present											Present		Present		Present		Present	Present										Present	Present	Present
106/13	ERS563940	ERR654244	Low-risk region	A	2013	> 60	M	ND	1	1	ND	ND	ND	ND	ND	ND	Yes		Present											Present		Present		Present			Present										Present	Present	Present
115/13	ERS563927	ERR654245	African region	ND	2013	16-60	M	Africa	4	ND	ND	ND	ND	ND	ND	ND	Yes		Present											Present		Present				Present	Present										Present		Present
136/13	ERS563933	ERR654246	Low-risk region	C	2013	16-60	M	None	1	3	ND	ND	ND	ND	ND	ND	Yes		Present					Present	Present					Present		Present		Present		Present	Present				Present						Present	Present
147/13	ERS563923	ERR654247	Low-risk region	B	2013	16-60	M	ND	1	3	ND	ND	ND	ND	ND	ND	Yes		Present			Present								Present				Present								Present					Present	Present	Present
179/13	ERS563918	ERR654248	Low-risk region	A	2013	16-60	M	None	1	1	ND	ND	ND	ND	ND	ND	Yes		Present											Present		Present		Present			Present										Present	Present	Present
198/13	ERS563941	ERR654249	Low-risk region	A	2013	16-60	M	None	1	1	ND	ND	ND	ND	ND	ND	Yes		Present											Present		Present		Present		Present	Present										Present	Present	Present
201/13	ERS563942	ERR654250	African region	ND	2013	16-60	M	None	2	ND	ND	ND	ND	ND	ND	ND	Yes		Present					Present	Present					Present		Present				Present	Present				Present						Present		Present
204/13	ERS563926	ERR654251	Low-risk region	A	2013	16-60	M	None	1	1	ND	ND	ND	ND	ND	ND	Yes		Present											Present		Present		Present			Present										Present	Present	Present
214/13	ERS563938	ERR654252	Low-risk region	B	2013	16-60	M	None	1	3	ND	ND	ND	ND	ND	ND	Yes		Present			Present								Present				Present								Present					Present	Present	Present
217/13	ERS563939	ERR654253	Low-risk region	C	2013	16-60	M	ND	1	3	ND	ND	ND	ND	ND	ND	Yes		Present											Present		Present		Present			Present										Present	Present	Present
228/13	ERS563945	ERR654254	Low-risk region	B	2013	16-60	M	None	1	3	ND	ND	ND	ND	ND	ND	Yes		Present			Present								Present				Present		Present						Present					Present	Present	Present
237/13	ERS563946	ERR654255	Low-risk region	C	2013	16-60	M	None	1	3	ND	ND	ND	ND	ND	ND	Yes		Present					Present	Present					Present		Present		Present			Present				Present						Present	Present	Present
285/13	ERS563928	ERR654256	Low-risk region	B	2013	16-60	M	None	1	3	ND	ND	ND	ND	ND	ND	Yes		Present			Present		Present	Present					Present				Present								Present					Present	Present	Present
287/13	ERS563929	ERR654257	African region	ND	2013	16-60	M	Africa	2	ND	ND	ND	ND	ND	ND	ND	Yes		Present											Present		Present				Present	Present										Present		Present
290/13	ERS563920	ERR654258	Low-risk region	C	2013	16-60	M	Oceania	1	3	ND	ND	ND	ND	ND	ND	Yes		Present					Present	Present					Present		Present		Present			Present				Present						Present	Present	Present
293/13	ERS563930	ERR654259	Low-risk region	A	2013	16-60	M	None	1	1	ND	ND	ND	ND	ND	ND	Yes		Present											Present				Present		Present	Present										Present	Present	Present
307/13	ERS563934	ERR654260	Low-risk region	A	2013	16-60	M	ND	1	1	ND	ND	ND	ND	ND	ND	Yes		Present											Present		Present		Present			Present										Present	Present	Present
348/13	ERS563947	ERR654261	African region	ND	2013	16-60	M	ND	2	ND	ND	ND	ND	ND	ND	ND	Yes		Present					Present	Present					Present		Present				Present	Present				Present						Present		Present
351/13	ERS563954	ERR654262	Low-risk region	C	2013	16-60	M	ND	1	3	ND	ND	ND	ND	ND	ND	Yes		Present					Present	Present					Present		Present		Present		Present	Present				Present						Present	Present	Present
365/13	ERS563924	ERR654263	Low-risk region	C	2013	16-60	M	ND	1	3	ND	ND	ND	ND	ND	ND	Yes		Present											Present		Present		Present			Present										Present	Present	Present
368/13	ERS563944	ERR654264	Low-risk region	C	2013	16-60	M	None	1	3	ND	ND	ND	ND	ND	ND	Yes		Present					Present	Present					Present		Present		Present			Present				Present						Present		Present
369/13A	ERS563917	ERR654265	Low-risk region	B	2013	16-60	M	None	1	3	ND	ND	ND	ND	ND	ND	Yes		Present			Present								Present				Present								Present					Present	Present	Present
369/13B	ERS563925	ERR654266	Low-risk region	A	2013	16-60	M	ND	1	1	ND	ND	ND	ND	ND	ND	Yes		Present											Present		Present		Present			Present										Present	Present	Present
388/13	ERS563953	ERR654267	Low-risk region	C	2013	16-60	M	ND	1	3	ND	ND	ND	ND	ND	ND	Yes		Present											Present		Present		Present			Present										Present	Present	Present
407/13	ERS563952	ERR654268	Low-risk region	C	2013	> 60	M	ND	1	3	ND	ND	ND	ND	ND	ND	Yes		Present											Present		Present		Present		Present	Present										Present	Present	Present
414/13	ERS563949	ERR654269	Low-risk region	A	2013	16-60	M	ND	1	1	ND	ND	ND	ND	ND	ND	Yes		Present											Present		Present		Present			Present										Present	Present	Present
415/13	ERS563950	ERR654270	Low-risk region	C	2013	16-60	M	ND	1	3	ND	ND	ND	ND	ND	ND	Yes		Present											Present		Present		Present			Present										Present	Present	Present
443/13	ERS563919	ERR654271	Low-risk region	B	2013	16-60	M	ND	1	3	ND	ND	ND	ND	ND	ND	Yes		Present			Present								Present				Present		Present						Present					Present	Present
447/13	ERS563957	ERR654272	Low-risk region	C	2013	16-60	M	ND	1	3	ND	ND	ND	ND	ND	ND	Yes		Present											Present	Present			Present		Present	Present										Present		Present
457/13	ERS563943	ERR654273	Low-risk region	A	2013	16-60	M	None	1	1	ND	ND	ND	ND	ND	ND	Yes		Present											Present		Present		Present			Present										Present	Present	Present
458/13	ERS563958	ERR654274	Low-risk region	A	2013	16-60	M	ND	1	1	ND	ND	ND	ND	ND	ND	Yes		Present											Present		Present		Present			Present										Present	Present	Present
461/13	ERS563936	ERR654275	Low-risk region	C	2013	16-60	M	ND	1	3	ND	ND	ND	ND	ND	ND	Yes		Present					Present	Present					Present		Present		Present			Present				Present						Present	Present	Present
503/13	ERS563937	ERR654276	Low-risk region	B	2013	16-60	M	ND	1	3	ND	ND	ND	ND	ND	ND	Yes		Present			Present		Present	Present					Present				Present		Present					Present	Present						Present	Present
505/13	ERS563960	ERR654277	Low-risk region	C	2013	16-60	M	ND	1	3	ND	ND	ND	ND	ND	ND	Yes		Present											Present		Present		Present			Present										Present	Present	Present
512/13	ERS563935	ERR654278	African region	ND	2013	16-60	M	ND	2	ND	ND	ND	ND	ND	ND	ND	Yes		Present					Present	Present					Present		Present				Present	Present				Present						Present		Present
548/13	ERS563921	ERR654279	Low-risk region	A	2013	16-60	M	None	1	1	ND	ND	ND	ND	ND	ND	Yes		Present											Present		Present		Present			Present										Present	Present	Present
580/13	ERS563959	ERR654280	Low-risk region	A	2013	> 60	M	ND	1	1	ND	ND	ND	ND	ND	ND	Yes		Present											Present		Present		Present		Present	Present										Present	Present	Present
592/13	ERS563931	ERR654281	Low-risk region	A	2013	16-60	M	ND	1	1	ND	ND	ND	ND	ND	ND	Yes		Present											Present	Present			Present		Present	Present										Present	Present
627/13	ERS563956	ERR654282	Low-risk region	C	2013	> 60	M	None	1	3	ND	ND	ND	ND	ND	ND	Yes		Present					Present	Present					Present		Present		Present		Present	Present				Present						Present		Present
663/13	ERS563951	ERR654283	Low-risk region	ND	2013	16-60	M	None	1	3	ND	ND	ND	ND	ND	ND	Yes		Present											Present		Present				Present	Present										Present		Present
695/13	ERS563922	ERR654284	Asian region	ND	2013	> 60	M	ND	3	ND	ND	ND	ND	ND	ND	ND	Yes	Present	Present	Present						Present				Present						Present	Present		Present				Present				Present
76/13	ERS563955	ERR654242	Low-risk region	C	2013	16-60	M	ND	1	3	ND	ND	ND	ND	ND	ND	Yes		Present											Present		Present		Present			Present										Present	Present	Present
806/13	ERS563932	ERR654285	African region	ND	2013	> 60	M	Africa	2	ND	ND	ND	ND	ND	ND	ND	Yes		Present					Present	Present					Present		Present				Present	Present				Present						Present		Present
84/13	ERS563948	ERR654243	Low-risk region	A	2013	16-60	M	ND	1	1	ND	ND	ND	ND	ND	ND	Yes		Present											Present		Present		Present			Present										Present	Present	Present
ERS369515	ERS369515	ERR449045	Low-risk region	B	2013	16-60	M	None	1	3	ND	ND	ND	ND	ND	ND	Yes		Present			Present								Present				Present		Present						Present					Present	Present	Present
ERS369516	ERS369516	ERR449046	Low-risk region	C	2013	16-60	M	None	1	3	ND	ND	ND	ND	ND	ND	Yes		Present					Present	Present					Present		Present		Present		Present	Present				Present						Present	Present	Present
ERS369517	ERS369517	ERR449047	Low-risk region	A	2013	16-60	M	ND	1	1	ND	ND	ND	ND	ND	ND	Yes		Present					Present	Present					Present		Present		Present		Present	Present										Present	Present	Present
ERS369518	ERS369518	ERR449048	Low-risk region	C	2013	16-60	M	None	1	3	ND	ND	ND	ND	ND	ND	Yes		Present					Present	Present					Present		Present		Present			Present				Present						Present	Present	Present
ERS369519	ERS369519	ERR449049	Low-risk region	B	2013	16-60	M	None	1	3	ND	ND	ND	ND	ND	ND	Yes		Present			Present								Present				Present		Present						Present					Present	Present	Present
ERS369520	ERS369520	ERR449050	Low-risk region	B	2013	16-60	M	None	1	3	ND	ND	ND	ND	ND	ND	Yes		Present			Present								Present				Present		Present						Present					Present	Present	Present
ERS369521	ERS369521	ERR449051	Low-risk region	A	2013	16-60	M	None	1	1	ND	ND	ND	ND	ND	ND	Yes		Present											Present		Present		Present		Present	Present										Present	Present	Present
ERS369522	ERS369522	ERR449052	Low-risk region	A	2013	16-60	M	ND	1	1	ND	ND	ND	ND	ND	ND	Yes		Present											Present		Present		Present		Present	Present										Present	Present	Present
ERS369523	ERS369523	ERR449053	Asian region	ND	2013	16-60	M	Asia	3	ND	ND	ND	ND	ND	ND	ND	Yes		Present											Present						Present	Present		Present								Present		Present
ERS369524	ERS369524	ERR449054	Low-risk region	B	2013	16-60	M	ND	1	3	ND	ND	ND	ND	ND	ND	Yes		Present			Present								Present				Present		Present						Present					Present	Present	Present
ERS369525	ERS369525	ERR449055	Low-risk region	A	2013	16-60	M	None	1	1	ND	ND	ND	ND	ND	ND	Yes		Present											Present		Present		Present		Present	Present										Present	Present	Present
SRR11741246	ND	SRR11741246	ND	ND	2020	16-60	F	ND	1	5	Yes	35	43	43	43	1189	Yes		Present											Present		Present					Present										Present	Present	Present
ERS369527	ERS369527	ERR449057	Low-risk region	A	2013	16-60	M	None	1	1	ND	ND	ND	ND	ND	ND	Yes		Present											Present		Present		Present		Present	Present										Present	Present	Present
ERS369528	ERS369528	ERR449058	Low-risk region	A	2013	16-60	M	ND	1	1	ND	ND	ND	ND	ND	ND	Yes		Present											Present		Present		Present			Present										Present	Present	Present
ERS369529	ERS369529	ERR449059	Low-risk region	A	2013	16-60	M	ND	1	1	ND	ND	ND	ND	ND	ND	Yes		Present											Present		Present		Present			Present										Present	Present	Present
ERS369530	ERS369530	ERR449060	Low-risk region	B	2013	16-60	M	ND	1	3	ND	ND	ND	ND	ND	ND	Yes		Present			Present								Present				Present		Present						Present					Present	Present	Present
ERS369531	ERS369531	ERR449061	Low-risk region	C	2013	16-60	M	None	1	3	ND	ND	ND	ND	ND	ND	Yes		Present					Present	Present					Present		Present		Present		Present	Present				Present						Present	Present	Present
ERS369533	ERS369533	ERR449062	Low-risk region	A	2013	16-60	M	ND	1	1	ND	ND	ND	ND	ND	ND	Yes		Present											Present		Present		Present		Present	Present										Present	Present	Present
ERS369534	ERS369534	ERR449063	Low-risk region	A	2013	16-60	M	None	1	1	ND	ND	ND	ND	ND	ND	Yes		Present											Present		Present		Present		Present	Present										Present	Present	Present
ERS369535	ERS369535	ERR449064	Low-risk region	C	2013	16-60	M	ND	1	3	ND	ND	ND	ND	ND	ND	Yes		Present					Present	Present					Present		Present		Present			Present				Present						Present	Present	Present
ERS369536	ERS369536	ERR449065	Low-risk region	A	2013	16-60	M	ND	1	1	ND	ND	ND	ND	ND	ND	Yes		Present											Present		Present		Present		Present	Present										Present	Present	Present
ERS369537	ERS369537	ERR449066	Low-risk region	A	2013	16-60	M	None	1	1	ND	ND	ND	ND	ND	ND	Yes		Present											Present		Present		Present			Present										Present	Present	Present
ERS369538	ERS369538	ERR449067	Low-risk region	A	2013	16-60	M	ND	1	1	ND	ND	ND	ND	ND	ND	Yes		Present											Present		Present		Present			Present										Present	Present	Present
ERS369539	ERS369539	ERR449068	Low-risk region	A	2013	16-60	M	None	1	1	ND	ND	ND	ND	ND	ND	Yes		Present			Present								Present		Present		Present		Present	Present					Present					Present		Present
ERS369542	ERS369542	ERR449070	Low-risk region	A	2013	16-60	M	ND	1	1	ND	ND	ND	ND	ND	ND	Yes		Present											Present		Present		Present		Present	Present										Present	Present	Present
ERS369543	ERS369543	ERR449071	Low-risk region	A	2013	16-60	M	ND	1	1	ND	ND	ND	ND	ND	ND	Yes		Present											Present		Present		Present		Present	Present										Present	Present	Present
ERS369544	ERS369544	ERR449072	Low-risk region	A	2013	16-60	M	ND	1	1	ND	ND	ND	ND	ND	ND	Yes		Present											Present		Present		Present		Present	Present										Present	Present	Present
ERS369545	ERS369545	ERR449073	Low-risk region	A	2013	16-60	M	ND	1	1	ND	ND	ND	ND	ND	ND	Yes		Present											Present		Present		Present		Present	Present										Present	Present	Present
ERS369546	ERS369546	ERR449074	Low-risk region	A	2013	16-60	M	None	1	1	ND	ND	ND	ND	ND	ND	Yes		Present											Present		Present		Present		Present	Present										Present	Present	Present
ERS369547	ERS369547	ERR449075	Low-risk region	A	2013	16-60	M	ND	1	1	ND	ND	ND	ND	ND	ND	Yes		Present											Present		Present		Present		Present	Present										Present	Present	Present
SRR4192070	ND	SRR4192070	ND	ND	2016	< 16	M	ND	4	ND	No	50	149	233	372	414	Yes													Present						Present											Present		Present
SRR4786481	ND	SRR4786481	ND	ND	2016	16-60	M	ND	1	1	No	35	43	43	43	1184	Yes		Present											Present		Present		Present			Present										Present	Present	Present
SRR4786482	ND	SRR4786482	ND	ND	2016	16-60	M	None	1	1	No	35	43	43	43	43	Yes		Present											Present		Present		Present			Present							Present			Present	Present	Present
SRR4786747	ND	SRR4786747	ND	ND	2016	< 16	M	None	3	ND	No	78	324	704	1032	1287	Yes		Present											Present						Present	Present		Present								Present		Present
SRR12175204	ND	SRR12175204	ND	ND	2020	> 60	F	ND	1	5	Yes	35	43	43	43	1189	Yes		Present											Present		Present	Present			Present	Present					Present					Present	Present	Present
SRR4787202	ND	SRR4787202	ND	ND	2016	16-60	M	ND	1	1	No	35	43	43	43	1238	Yes		Present											Present		Present		Present			Present										Present	Present	Present
SRR4787206	ND	SRR4787206	ND	ND	2016	16-60	M	ND	1	1	No	35	43	43	43	43	Yes		Present											Present		Present		Present			Present										Present	Present	Present
SRR4787212	ND	SRR4787212	ND	ND	2016	16-60	M	None	1	1	No	35	43	43	43	1232	Yes		Present											Present		Present					Present										Present		Present
SRR12354739	ND	SRR12354739	ND	ND	2020	16-60	F	ND	1	5	Yes	35	43	43	43	1189	Yes		Present											Present		Present					Present										Present		Present
SRR4787414	ND	SRR4787414	ND	ND	2016	16-60	M	ND	1	1	No	35	43	43	43	1232	Yes		Present											Present		Present					Present										Present		Present
SRR4787415	ND	SRR4787415	ND	ND	2016	16-60	M	ND	1	3	No	35	43	621	939	1192	Yes		Present											Present		Present		Present			Present										Present	Present	Present
SRR4787773	ND	SRR4787773	ND	ND	2016	16-60	M	Asia	1	1	No	35	43	43	43	1232	Yes		Present											Present		Present					Present										Present		Present
SRR12672083	ND	SRR12672083	ND	ND	2020	16-60	F	ND	1	5	Yes	35	43	43	43	1189	Yes		Present											Present		Present					Present										Present		Present
SRR4788196	ND	SRR4788196	ND	ND	2016	> 60	M	Europe	1	5	Yes	35	43	43	43	1189	Yes		Present											Present		Present					Present										Present		Present
SRR4788220	ND	SRR4788220	ND	ND	2016	16-60	M	ND	1	4	No	35	43	678	1003	1340	Yes		Present					Present	Present					Present		Present			Present	Present	Present				Present						Present		Present
SRR4897018	ND	SRR4897018	ND	ND	2016	16-60	M	None	1	1	No	35	43	43	43	43	Yes		Present											Present		Present		Present			Present										Present	Present	Present
SRR4897081	ND	SRR4897081	ND	ND	2016	16-60	M	ND	1	1	No	35	43	43	43	1280	Yes		Present											Present		Present					Present										Present		Present
SRR4897091	ND	SRR4897091	ND	ND	2016	16-60	M	Europe	1	1	No	35	43	43	43	43	Yes		Present											Present		Present		Present			Present										Present	Present	Present
SRR4897154	ND	SRR4897154	ND	ND	2016	16-60	M	ND	1	3	No	35	43	621	939	1222	Yes		Present											Present		Present		Present			Present										Present	Present	Present
SRR4897333	ND	SRR4897333	ND	ND	2016	16-60	M	ND	1	3	No	35	43	621	939	1179	Yes		Present											Present		Present					Present										Present	Present	Present
SRR4897436	ND	SRR4897436	ND	ND	2016	16-60	M	None	1	1	No	35	43	43	43	43	Yes		Present											Present		Present		Present			Present							Present			Present	Present	Present
SRR4897473	ND	SRR4897473	ND	ND	2016	16-60	M	ND	3	ND	No	78	324	644	966	1208	Yes		Present					Present	Present					Present				Present		Present	Present		Present								Present		Present
SRR4897493	ND	SRR4897493	ND	ND	2016	16-60	M	ND	3	ND	No	78	324	644	966	1208	Yes		Present											Present						Present	Present		Present								Present		Present
SRR4897512	ND	SRR4897512	ND	ND	2016	16-60	M	ND	2	ND	No	33	209	351	530	609	Yes													Present						Present											Present		Present
SRR4897724	ND	SRR4897724	ND	ND	2016	16-60	M	None	1	1	No	35	43	43	43	1232	Yes		Present											Present		Present					Present										Present		Present
SRR4897726	ND	SRR4897726	ND	ND	2016	16-60	M	ND	1	5	Yes	35	43	43	43	1189	Yes		Present											Present		Present					Present										Present		Present
SRR12803198	ND	SRR12803198	ND	ND	2020	16-60	F	ND	1	5	Yes	35	43	43	43	1189	Yes		Present											Present		Present					Present										Present		Present
SRR4897819	ND	SRR4897819	ND	ND	2016	16-60	M	None	1	1	No	35	43	43	43	43	Yes		Present											Present		Present		Present		Present	Present										Present	Present	Present
SRR4897830	ND	SRR4897830	ND	ND	2016	16-60	M	ND	1	3	No	35	43	621	939	1192	Yes		Present											Present		Present		Present			Present										Present	Present	Present
SRR5005302	ND	SRR5005302	ND	ND	2016	16-60	M	ND	1	1	No	35	43	43	43	43	Yes		Present											Present		Present		Present		Present	Present										Present	Present	Present
SRR7172438	ND	SRR7172438	ND	ND	2016	16-60	F	Africa	2	ND	No	19	23	53	559	656	Yes		Present					Present	Present					Present		Present				Present	Present				Present						Present		Present
SRR5006061	ND	SRR5006061	ND	ND	2016	16-60	M	ND	1	3	No	35	43	621	939	1192	Yes		Present											Present		Present		Present			Present										Present	Present	Present
SRR7179907	ND	SRR7179907	ND	ND	2016	16-60	F	Africa	2	ND	No	18	223	376	571	673	Yes							Present	Present					Present						Present					Present						Present		Present
SRR7187825	ND	SRR7187825	ND	ND	2017	> 60	F	Africa	2	ND	No	19	23	53	106	738	Yes		Present											Present		Present				Present	Present										Present		Present
SRR5006367	ND	SRR5006367	ND	ND	2016	16-60	M	ND	1	1	No	35	43	43	43	43	Yes		Present											Present		Present		Present		Present	Present										Present		Present
SRR5018095	ND	SRR5018095	ND	ND	2016	> 60	M	Asia	2	ND	No	19	173	281	433	493	Yes							Present	Present					Present						Present					Present						Present		Present
SRR5024324	ND	SRR5024324	ND	ND	2016	16-60	M	ND	1	1	No	35	43	43	43	43	Yes		Present											Present		Present		Present			Present										Present	Present	Present
SRR5024516	ND	SRR5024516	ND	ND	2016	16-60	M	ND	1	1	No	35	43	43	43	43	Yes		Present											Present		Present		Present			Present										Present	Present	Present
SRR7209000	ND	SRR7209000	ND	ND	2017	16-60	F	Africa	2	ND	No	19	23	451	688	835	Yes		Present					Present	Present					Present		Present				Present	Present				Present						Present		Present
SRR7230217	ND	SRR7230217	ND	ND	2017	16-60	F	Africa	2	ND	No	19	23	454	691	842	Yes							Present	Present					Present						Present					Present						Present		Present
SRR7186936	ND	SRR7186936	ND	ND	2016	> 60	M	Europe	3	ND	No	78	359	713	1070	1336	Yes		Present									Present		Present						Present	Present		Present								Present		Present
SRR7187772	ND	SRR7187772	ND	ND	2016	16-60	M	None	1	3	No	35	43	621	939	1192	Yes		Present											Present		Present		Present			Present										Present	Present	Present
SRR7191564	ND	SRR7191564	ND	ND	2016	< 16	M	ND	7	ND	No	66	224	381	576	681	Yes						Present							Present						Present											Present		Present
SRR7250982	ND	SRR7250982	ND	ND	2016	16-60	M	ND	1	1	No	35	43	43	43	43	Yes		Present											Present		Present		Present			Present							Present			Present	Present	Present
SRR7251004	ND	SRR7251004	ND	ND	2016	16-60	M	ND	1	1	No	35	43	43	43	43	Yes		Present											Present		Present		Present			Present										Present	Present	Present
SRR7256995	ND	SRR7256995	ND	ND	2016	16-60	M	ND	1	1	No	35	43	43	43	43	Yes		Present											Present		Present		Present			Present										Present	Present	Present
SRR7265847	ND	SRR7265847	ND	ND	2016	16-60	M	None	1	1	No	35	43	43	43	43	Yes		Present											Present		Present		Present			Present										Present	Present	Present
SRR8240965	ND	SRR8240965	ND	ND	2018	< 16	F	ND	2	ND	No	19	118	864	1218	1530	Yes		Present											Present		Present				Present	Present										Present		Present
SRR7277765	ND	SRR7277765	ND	ND	2016	16-60	M	ND	1	3	No	35	43	621	939	1192	Yes		Present											Present		Present		Present			Present										Present	Present	Present
SRR10843858	ND	SRR10843858	ND	ND	2019	16-60	F	Africa	2	ND	No	19	23	53	1447	1863	Yes		Present											Present		Present				Present	Present										Present		Present
SRR7286393	ND	SRR7286393	ND	ND	2016	16-60	M	ND	1	4	No	35	43	678	1003	1254	Yes		Present					Present	Present					Present		Present			Present		Present				Present						Present		Present
SRR7358109	ND	SRR7358109	ND	ND	2016	16-60	M	None	1	4	No	35	43	678	1003	1254	Yes		Present					Present	Present					Present		Present			Present		Present				Present						Present		Present
SRR8893083	ND	SRR8893083	ND	ND	2019	16-60	F	ND	2	ND	No	19	23	903	1289	1641	Yes		Present					Present	Present					Present		Present				Present	Present				Present						Present		Present
SRR8981836	ND	SRR8981836	ND	ND	2019	> 60	F	ND	2	ND	No	19	23	905	1294	1649	Yes		Present											Present		Present				Present	Present										Present		Present
SRR7172409	ND	SRR7172409	ND	ND	2017	< 16	M	Asia	3	ND	No	78	324	758	1089	1360	Yes		Present											Present						Present	Present		Present								Present		Present
SRR7184222	ND	SRR7184222	ND	ND	2017	16-60	M	Yes,destination unknown	3	ND	No	78	325	625	971	1219	Yes		Present											Present				Present		Present	Present		Present								Present		Present
SRR11361235	ND	SRR11361235	ND	ND	2020	16-60	F	ND	2	ND	No	19	23	53	675	1927	Yes		Present											Present		Present				Present	Present										Present		Present
SRR11361810	ND	SRR11361810	ND	ND	2020	< 16	F	ND	2	ND	No	19	23	53	675	1927	Yes		Present											Present		Present				Present	Present										Present		Present
SRR7187098	ND	SRR7187098	ND	ND	2017	16-60	M	ND	3	ND	No	78	325	625	943	1181	Yes		Present						Present					Present				Present		Present	Present		Present								Present		Present
SRR7187533	ND	SRR7187533	ND	ND	2017	> 60	M	Africa	2	ND	No	19	23	53	675	813	Yes		Present											Present		Present				Present	Present										Present		Present
ERS369457	ERS369457	ERR448990	Asian region	ND	2009	16-60	F	None	3	ND	ND	ND	ND	ND	ND	ND	Yes		Present											Present		Present				Present	Present										Present		Present
ERS369479	ERS369479	ERR449012	Asian region	ND	2011	16-60	F	None	3	ND	ND	ND	ND	ND	ND	ND	Yes		Present											Present						Present	Present		Present								Present		Present
SRR7187756	ND	SRR7187756	ND	ND	2017	< 16	M	ND	3	ND	No	78	324	633	954	1195	Yes		Present											Present						Present	Present		Present								Present		Present
SRR4786753	ND	SRR4786753	ND	ND	2016	> 60	F	None	3	ND	No	78	324	785	1119	1397	Yes		Present											Present						Present	Present		Present								Present		Present
SRR7208628	ND	SRR7208628	ND	ND	2017	> 60	M	ND	1	1	No	35	43	43	43	43	Yes																	Present		Present												Present
ERS369492	ERS369492	ERR449024	Asian region	ND	2012	16-60	F	None	3	ND	ND	ND	ND	ND	ND	ND	Yes		Present											Present						Present	Present		Present								Present		Present
ERS369526	ERS369526	ERR449056	Asian region	ND	2013	16-60	F	None	3	ND	ND	ND	ND	ND	ND	ND	Yes		Present											Present						Present	Present		Present								Present		Present
SRR4787303	ND	SRR4787303	ND	ND	2016	16-60	F	Asia	3	ND	No	78	324	721	1049	1312	Yes		Present											Present						Present			Present								Present		Present
SRR4788107	ND	SRR4788107	ND	ND	2016	16-60	F	ND	3	ND	No	78	324	684	1009	1260	Yes		Present											Present						Present	Present		Present								Present		Present
SRR7221032	ND	SRR7221032	ND	ND	2017	16-60	M	ND	1	3	No	35	43	621	939	1192	Yes		Present											Present		Present		Present			Present										Present	Present	Present
SRR7221211	ND	SRR7221211	ND	ND	2017	16-60	M	ND	1	5	Yes	35	43	43	43	1189	Yes		Present											Present		Present					Present										Present	Present	Present
SRR7221238	ND	SRR7221238	ND	ND	2017	16-60	M	ND	1	1	No	35	43	43	43	1184	Yes		Present											Present		Present		Present			Present										Present	Present	Present
SRR7221289	ND	SRR7221289	ND	ND	2017	16-60	M	ND	2	ND	No	19	23	478	737	908	Yes		Present					Present	Present					Present		Present				Present	Present				Present						Present		Present
SRR5005425	ND	SRR5005425	ND	ND	2016	< 16	F	Europe	3	ND	No	78	324	633	1145	1426	Yes		Present											Present						Present	Present		Present								Present		Present
SRR5006082	ND	SRR5006082	ND	ND	2016	< 16	F	Asia	3	ND	No	78	324	664	1007	1343	Yes		Present											Present						Present	Present		Present								Present		Present
SRR7230248	ND	SRR7230248	ND	ND	2017	< 16	M	South America	1	4	No	35	43	766	1099	1372	Yes		Present											Present		Present					Present										Present		Present
SRR7236438	ND	SRR7236438	ND	ND	2017	16-60	M	Europe	1	5	Yes	35	43	43	43	1189	Yes		Present											Present		Present					Present										Present		Present
SRR7249502	ND	SRR7249502	ND	ND	2017	16-60	M	ND	1	5	Yes	35	43	43	43	1189	Yes		Present											Present		Present					Present										Present	Present	Present
SRR7251027	ND	SRR7251027	ND	ND	2017	16-60	M	Asia	1	2	No	35	43	813	1149	1430	Yes		Present											Present		Present					Present										Present		Present
SRR7251422	ND	SRR7251422	ND	ND	2017	16-60	M	None	1	3	No	35	43	621	939	1192	Yes		Present											Present		Present		Present			Present										Present	Present	Present
SRR7251492	ND	SRR7251492	ND	ND	2017	16-60	M	None	1	1	No	35	43	43	43	1423	Yes		Present											Present		Present					Present										Present		Present
SRR7266390	ND	SRR7266390	ND	ND	2017	16-60	M	Asia	1	1	No	35	43	43	43	1213	Yes		Present											Present		Present		Present			Present										Present		Present
SRR7266759	ND	SRR7266759	ND	ND	2017	< 16	M	ND	3	ND	No	78	324	664	992	1373	Yes		Present											Present						Present	Present		Present								Present		Present
SRR7266800	ND	SRR7266800	ND	ND	2017	16-60	M	ND	1	5	Yes	35	43	43	43	1189	Yes		Present											Present		Present					Present										Present		Present
SRR7266811	ND	SRR7266811	ND	ND	2017	16-60	M	South America	4	ND	No	50	237	409	623	741	Yes													Present						Present											Present		Present
SRR7274822	ND	SRR7274822	ND	ND	2017	16-60	M	None	1	5	Yes	35	43	43	43	1189	Yes		Present											Present		Present					Present										Present		Present
SRR7274835	ND	SRR7274835	ND	ND	2017	16-60	M	ND	1	5	Yes	35	43	43	43	1189	Yes		Present											Present		Present					Present										Present		Present
SRR7277705	ND	SRR7277705	ND	ND	2017	< 16	M	None	7	ND	No	66	224	381	576	681	Yes						Present							Present						Present											Present		Present
SRR5006097	ND	SRR5006097	ND	ND	2016	16-60	F	ND	3	ND	No	55	183	301	459	528	Yes		Present											Present		Present					Present										Present		Present
SRR7283802	ND	SRR7283802	ND	ND	2016	> 60	F	ND	3	ND	No	78	324	727	1055	1319	Yes		Present											Present						Present	Present		Present								Present		Present
SRR7172284	ND	SRR7172284	ND	ND	2017	16-60	F	Asia	3	ND	No	78	325	625	971	1271	Yes		Present											Present				Present		Present	Present		Present								Present		Present
SRR7291556	ND	SRR7291556	ND	ND	2017	< 16	M	None	2	ND	No	19	23	397	603	714	Yes		Present											Present		Present				Present	Present										Present		Present
SRR7291671	ND	SRR7291671	ND	ND	2017	> 60	M	ND	2	ND	No	19	23	485	748	924	Yes													Present						Present											Present		Present
SRR7215919	ND	SRR7215919	ND	ND	2017	16-60	F	ND	3	ND	No	78	324	633	954	1282	Yes		Present											Present						Present	Present		Present								Present		Present
SRR7367426	ND	SRR7367426	ND	ND	2017	< 16	M	None	7	ND	No	66	224	381	576	681	Yes						Present							Present						Present											Present		Present
SRR7367433	ND	SRR7367433	ND	ND	2017	< 16	M	None	4	ND	No	50	213	365	560	657	Yes													Present						Present											Present		Present
SRR7208796	ND	SRR7208796	ND	ND	2018	< 16	M	ND	3	ND	No	78	324	620	937	1246	Yes		Present											Present						Present	Present		Present								Present		Present
SRR7215945	ND	SRR7215945	ND	ND	2018	> 60	M	ND	4	ND	No	32	40	500	773	961	Yes	Present	Present											Present		Present					Present									Present	Present		Present
SRR7230237	ND	SRR7230237	ND	ND	2017	< 16	F	ND	3	ND	No	83	388	806	1141	1421	Yes							Present	Present					Present				Present		Present					Present						Present		Present
SRR7286510	ND	SRR7286510	ND	ND	2017	> 60	F	ND	3	ND	No	78	324	620	937	1438	Yes		Present										Present	Present						Present	Present		Present								Present		Present
SRR7249700	ND	SRR7249700	ND	ND	2018	< 16	M	None	2	ND	No	19	23	53	783	975	Yes		Present											Present		Present				Present	Present										Present		Present
SRR7286528	ND	SRR7286528	ND	ND	2017	16-60	F	Asia	3	ND	No	78	324	686	1011	1262	Yes		Present											Present						Present	Present		Present								Present		Present
SRR7265968	ND	SRR7265968	ND	ND	2018	< 16	F	Europe	3	ND	No	78	324	733	1062	1326	Yes		Present											Present						Present	Present		Present								Present		Present
SRR7291620	ND	SRR7291620	ND	ND	2018	> 60	M	Asia	3	ND	No	78	324	664	1007	1258	Yes		Present								Present			Present						Present	Present		Present								Present		Present
SRR7358110	ND	SRR7358110	ND	ND	2018	< 16	M	ND	3	ND	No	78	324	620	937	1246	Yes		Present											Present						Present	Present		Present								Present		Present
SRR7282626	ND	SRR7282626	ND	ND	2018	16-60	F	ND	3	ND	No	78	324	664	1007	1258	Yes		Present											Present							Present		Present								Present		Present
SRR7367455	ND	SRR7367455	ND	ND	2018	> 60	M	None	1	1	No	35	43	43	43	43	Yes		Present											Present		Present		Present		Present	Present										Present		Present
SRR7416059	ND	SRR7416059	ND	ND	2018	16-60	M	ND	1	5	Yes	35	43	43	43	1189	Yes		Present											Present		Present					Present										Present	Present	Present
SRR7588717	ND	SRR7588717	ND	ND	2018	16-60	M	None	6	ND	No	34	42	42	42	727	Yes		Present											Present		Present				Present	Present										Present	Present	Present
SRR7827033	ND	SRR7827033	ND	ND	2018	16-60	M	None	1	1	No	35	43	43	43	1184	Yes		Present											Present		Present		Present			Present										Present	Present	Present
SRR7839343	ND	SRR7839343	ND	ND	2018	16-60	M	ND	3	ND	No	78	324	833	1177	1473	Yes		Present											Present						Present	Present		Present								Present		Present
SRR7842059	ND	SRR7842059	ND	ND	2018	16-60	M	ND	1	5	Yes	35	43	43	43	1189	Yes		Present											Present		Present					Present										Present	Present	Present
SRR7842161	ND	SRR7842161	ND	ND	2018	16-60	M	Africa	4	ND	No	85	392	821	1161	1449	Yes		Present					Present	Present					Present		Present				Present	Present				Present						Present		Present
SRR7850023	ND	SRR7850023	ND	ND	2018	16-60	M	ND	2	ND	No	19	23	825	1168	1459	Yes		Present											Present		Present					Present										Present		Present
SRR7850164	ND	SRR7850164	ND	ND	2018	16-60	M	Asia	3	ND	No	78	324	834	1178	1474	Yes		Present											Present						Present	Present		Present								Present		Present
SRR7943893	ND	SRR7943893	ND	ND	2018	16-60	M	Africa	4	ND	No	20	271	505	780	970	Yes													Present				Present		Present									Present		Present		Present
SRR8086727	ND	SRR8086727	ND	ND	2018	> 60	M	None	3	ND	No	55	402	845	1193	1495	Yes		Present											Present		Present					Present										Present		Present
SRR8114755	ND	SRR8114755	ND	ND	2018	> 60	M	Africa	4	ND	No	20	271	505	780	970	Yes													Present						Present											Present		Present
SRR8149133	ND	SRR8149133	ND	ND	2018	16-60	M	ND	1	5	Yes	35	43	43	43	1189	Yes		Present											Present		Present					Present										Present	Present	Present
SRR7358280	ND	SRR7358280	ND	ND	2018	< 16	F	ND	3	ND	No	78	324	775	1109	1385	Yes													Present						Present											Present		Present
SRR8263048	ND	SRR8263048	ND	ND	2018	16-60	M	None	1	1	No	35	43	43	43	43	Yes		Present											Present		Present		Present		Present	Present										Present		Present
SRR8281081	ND	SRR8281081	ND	ND	2018	< 16	M	Asia	3	ND	No	78	324	869	1226	1540	Yes		Present											Present						Present	Present		Present								Present		Present
SRR8293754	ND	SRR8293754	ND	ND	2018	16-60	M	ND	1	5	Yes	35	43	43	43	1189	Yes		Present											Present		Present					Present										Present		Present
SRR8293757	ND	SRR8293757	ND	ND	2018	16-60	M	Asia	3	ND	No	78	324	877	1236	1552	Yes		Present											Present						Present	Present		Present								Present		Present
SRR8297020	ND	SRR8297020	ND	ND	2018	16-60	M	Africa	6	ND	No	34	42	42	42	727	Yes		Present											Present		Present		Present		Present	Present										Present		Present
SRR10236627	ND	SRR10236627	ND	ND	2019	16-60	F	ND	3	ND	No	78	324	842	1189	1491	Yes		Present					Present	Present		Present			Present						Present	Present		Present								Present		Present
SRR10357093	ND	SRR10357093	ND	ND	2019	16-60	F	Asia	3	ND	No	78	324	620	937	1792	Yes		Present											Present						Present	Present		Present								Present		Present
SRR10036695	ND	SRR10036695	ND	ND	2019	16-60	M	ND	1	5	Yes	35	43	43	43	1189	Yes		Present											Present		Present				Present	Present										Present		Present
SRR10088446	ND	SRR10088446	ND	ND	2019	16-60	M	Asia	3	ND	No	78	324	930	1347	1722	Yes		Present											Present						Present	Present		Present								Present		Present
SRR10088473	ND	SRR10088473	ND	ND	2019	16-60	M	ND	1	5	Yes	35	43	43	43	1189	Yes		Present											Present		Present				Present	Present										Present		Present
SRR10198849	ND	SRR10198849	ND	ND	2019	16-60	M	ND	1	5	Yes	35	43	43	43	1189	Yes		Present								Present			Present		Present					Present										Present	Present	Present
SRR10212193	ND	SRR10212193	ND	ND	2019	16-60	M	ND	1	5	Yes	35	43	43	43	1189	Yes		Present											Present		Present				Present	Present										Present		Present
SRR10212203	ND	SRR10212203	ND	ND	2019	< 16	M	ND	2	ND	No	19	23	941	1367	1745	Yes		Present											Present	Present					Present	Present										Present		Present
SRR10228174	ND	SRR10228174	ND	ND	2019	16-60	M	None	1	5	Yes	35	43	43	43	1189	Yes		Present											Present		Present					Present										Present	Present	Present
SRR10599002	ND	SRR10599002	ND	ND	2019	16-60	F	ND	3	ND	No	78	324	641	1423	1831	Yes		Present										Present	Present			Present			Present	Present		Present								Present		Present
SRR10236639	ND	SRR10236639	ND	ND	2019	16-60	M	ND	1	5	Yes	35	43	43	43	1189	Yes		Present											Present		Present					Present										Present		Present
SRR10236648	ND	SRR10236648	ND	ND	2019	16-60	M	ND	1	5	Yes	35	43	43	43	1189	Yes		Present											Present		Present				Present	Present										Present		Present
SRR10271374	ND	SRR10271374	ND	ND	2019	16-60	M	ND	1	5	Yes	35	43	43	43	1189	Yes		Present											Present		Present				Present	Present										Present		Present
SRR10283320	ND	SRR10283320	ND	ND	2019	16-60	M	None	1	5	Yes	35	43	43	43	1189	Yes		Present											Present		Present					Present										Present	Present	Present
SRR9886075	ND	SRR9886075	ND	ND	2019	16-60	F	ND	3	ND	No	78	324	620	937	1438	Yes		Present										Present	Present						Present	Present		Present								Present		Present
SRR10302321	ND	SRR10302321	ND	ND	2019	16-60	M	ND	1	5	Yes	35	43	43	43	1189	Yes		Present											Present		Present					Present										Present		Present
SRR10314870	ND	SRR10314870	ND	ND	2019	16-60	M	ND	1	5	Yes	35	43	43	43	1189	Yes		Present											Present		Present					Present										Present		Present
SRR10314874	ND	SRR10314874	ND	ND	2019	16-60	M	ND	1	5	Yes	35	43	43	43	1189	Yes		Present											Present		Present					Present										Present	Present	Present
SRR10319754	ND	SRR10319754	ND	ND	2019	16-60	M	ND	4	ND	No	90	429	917	1317	1684	Yes		Present											Present		Present					Present							Present			Present	Present	Present
SRR10352158	ND	SRR10352158	ND	ND	2019	16-60	M	ND	1	5	Yes	35	43	43	43	1189	Yes		Present											Present		Present					Present										Present		Present
SRR10352161	ND	SRR10352161	ND	ND	2019	16-60	M	ND	1	5	Yes	35	43	43	43	1189	Yes		Present											Present		Present					Present										Present		Present
SRR10962088	ND	SRR10962088	ND	ND	2020	> 60	F	Asia	3	ND	No	78	324	620	937	1881	Yes		Present											Present						Present	Present		Present								Present		Present
SRR10380804	ND	SRR10380804	ND	ND	2019	16-60	M	ND	1	5	Yes	35	43	43	43	1189	Yes		Present											Present		Present				Present	Present										Present		Present
SRR10419840	ND	SRR10419840	ND	ND	2019	16-60	M	ND	1	5	Yes	35	43	43	43	1189	Yes		Present											Present		Present					Present										Present	Present	Present
SRR10419962	ND	SRR10419962	ND	ND	2019	16-60	M	ND	1	5	Yes	35	43	43	43	1189	Yes		Present											Present		Present					Present										Present		Present
SRR10424216	ND	SRR10424216	ND	ND	2019	16-60	M	None	1	5	Yes	35	43	43	43	1189	Yes		Present											Present		Present					Present										Present	Present	Present
SRR10431631	ND	SRR10431631	ND	ND	2019	16-60	M	None	1	5	Yes	35	43	43	43	1189	Yes		Present											Present		Present				Present	Present										Present		Present
SRR10452818	ND	SRR10452818	ND	ND	2019	16-60	M	ND	1	5	Yes	35	43	43	43	1189	Yes		Present											Present		Present					Present										Present	Present	Present
SRR10519441	ND	SRR10519441	ND	ND	2019	16-60	M	ND	1	5	Yes	35	43	43	43	1189	Yes		Present											Present		Present				Present	Present										Present	Present	Present
SRR10521909	ND	SRR10521909	ND	ND	2019	16-60	M	None	1	5	Yes	35	43	43	43	1189	Yes		Present											Present		Present				Present	Present										Present		Present
SRR10527358	ND	SRR10527358	ND	ND	2019	16-60	M	ND	1	5	Yes	35	43	43	43	1189	Yes		Present											Present		Present					Present										Present	Present	Present
SRR10559542	ND	SRR10559542	ND	ND	2019	16-60	M	ND	1	5	Yes	35	43	43	43	1189	Yes		Present											Present		Present				Present	Present										Present	Present	Present
SRR10605722	ND	SRR10605722	ND	ND	2019	16-60	M	ND	1	5	Yes	35	43	43	43	1189	Yes		Present											Present		Present					Present										Present	Present	Present
SRR10693128	ND	SRR10693128	ND	ND	2019	16-60	M	ND	4	ND	No	90	429	917	1317	1684	Yes		Present											Present		Present					Present							Present			Present	Present	Present
SRR10693136	ND	SRR10693136	ND	ND	2019	16-60	M	ND	1	5	Yes	35	43	43	43	1189	Yes		Present											Present		Present					Present										Present	Present	Present
ERS369463	ERS369463	ERR448996	African region	ND	2010	> 60	F	None	4	ND	ND	ND	ND	ND	ND	ND	Yes		Present											Present		Present				Present	Present										Present		Present
SRR10698341	ND	SRR10698341	ND	ND	2019	16-60	M	ND	1	5	Yes	35	43	43	43	1189	Yes		Present											Present		Present				Present	Present										Present		Present
SRR10742342	ND	SRR10742342	ND	ND	2019	16-60	M	ND	4	ND	No	90	429	917	1317	1684	Yes		Present											Present		Present					Present							Present			Present	Present	Present
SRR10760860	ND	SRR10760860	ND	ND	2019	> 60	M	ND	1	3	No	35	43	621	1438	1852	Yes		Present											Present		Present		Present			Present										Present	Present	Present
SRR10760861	ND	SRR10760861	ND	ND	2019	16-60	M	ND	1	5	Yes	35	43	43	43	1189	Yes		Present											Present		Present					Present										Present	Present	Present
ERS369476	ERS369476	ERR449009	African region	ND	2011	16-60	F	None	4	ND	ND	ND	ND	ND	ND	ND	Yes		Present											Present		Present					Present										Present		Present
SRR10799740	ND	SRR10799740	ND	ND	2019	16-60	M	Africa	2	ND	No	33	209	351	1441	1857	Yes							Present	Present					Present			Present			Present					Present						Present		Present
SRR10806322	ND	SRR10806322	ND	ND	2019	16-60	M	ND	1	5	Yes	35	43	43	43	1189	Yes		Present											Present		Present				Present	Present										Present		Present
ERS369477	ERS369477	ERR449010	African region	ND	2011	16-60	F	None	4	ND	ND	ND	ND	ND	ND	ND	Yes		Present											Present		Present					Present										Present		Present
SRR10806393	ND	SRR10806393	ND	ND	2019	16-60	M	ND	1	5	Yes	35	43	43	43	1189	Yes		Present											Present		Present				Present	Present										Present		Present
SRR4897768	ND	SRR4897768	ND	ND	2016	16-60	F	Africa	4	ND	No	32	151	236	375	421	Yes		Present											Present		Present					Present										Present		Present
SRR10858726	ND	SRR10858726	ND	ND	2019	16-60	M	None	1	5	Yes	35	43	43	43	1189	Yes		Present											Present		Present				Present	Present										Present		Present
SRR10858733	ND	SRR10858733	ND	ND	2019	16-60	M	ND	4	ND	No	90	429	917	1317	1684	Yes		Present											Present		Present				Present	Present							Present			Present		Present
SRR8452173	ND	SRR8452173	ND	ND	2019	16-60	M	Yes,destination unknown	2	ND	No	19	23	882	1247	1566	Yes		Present					Present	Present					Present		Present				Present	Present				Present						Present		Present
SRR8513651	ND	SRR8513651	ND	ND	2019	16-60	M	Africa	2	ND	No	19	23	53	1256	1582	Yes		Present											Present		Present					Present										Present		Present
SRR8551537	ND	SRR8551537	ND	ND	2019	< 16	M	ND	7	ND	No	66	417	891	1259	1591	Yes						Present	Present	Present				Present	Present						Present					Present						Present		Present
SRR8656991	ND	SRR8656991	ND	ND	2019	< 16	M	ND	3	ND	No	78	324	664	1007	1612	Yes		Present											Present						Present	Present		Present								Present		Present
SRR7266801	ND	SRR7266801	ND	ND	2016	16-60	F	South America	4	ND	No	50	213	365	560	657	Yes													Present						Present											Present		Present
SRR8774313	ND	SRR8774313	ND	ND	2019	< 16	M	None	3	ND	No	78	324	664	1007	1623	Yes		Present											Present						Present	Present		Present								Present		Present
SRR8820013	ND	SRR8820013	ND	ND	2019	> 60	M	ND	7	ND	No	89	421	899	1281	1627	Yes						Present							Present				Present		Present										Present	Present		Present
SRR8832733	ND	SRR8832733	ND	ND	2019	16-60	M	Africa	2	ND	No	19	423	901	1283	1631	Yes		Present											Present	Present					Present											Present		Present
SRR8873627	ND	SRR8873627	ND	ND	2019	16-60	M	Asia	3	ND	No	78	324	664	1007	1634	Yes		Present											Present						Present	Present		Present								Present		Present
SRR7172275	ND	SRR7172275	ND	ND	2017	16-60	F	South America	4	ND	No	67	227	385	586	693	Yes													Present						Present											Present		Present
SRR8979627	ND	SRR8979627	ND	ND	2019	> 60	M	None	3	ND	No	78	324	620	937	1648	Yes		Present											Present						Present	Present		Present								Present		Present
SRR7367389	ND	SRR7367389	ND	ND	2017	16-60	F	Asia	4	ND	No	32	250	443	679	823	Yes		Present											Present		Present					Present										Present		Present
SRR9151842	ND	SRR9151842	ND	ND	2019	16-60	M	None	1	5	Yes	35	43	43	43	1189	Yes		Present											Present		Present				Present	Present										Present		Present
SRR9222624	ND	SRR9222624	ND	ND	2019	16-60	M	ND	4	ND	No	90	429	917	1317	1684	Yes		Present											Present		Present					Present							Present			Present	Present	Present
SRR9257722	ND	SRR9257722	ND	ND	2019	> 60	M	Asia	5	ND	No	21	25	881	1246	1656	Yes		Present			Present		Present	Present				Present	Present		Present				Present	Present		Present			Present					Present		Present
SRR9257780	ND	SRR9257780	ND	ND	2019	16-60	M	ND	1	5	Yes	35	43	43	43	1189	Yes		Present											Present		Present				Present	Present										Present	Present	Present
SRR9259309	ND	SRR9259309	ND	ND	2019	16-60	M	North America	1	5	Yes	35	43	43	43	1189	Yes		Present											Present		Present					Present										Present		Present
SRR9259828	ND	SRR9259828	ND	ND	2019	16-60	M	ND	1	5	Yes	35	43	43	43	1189	Yes		Present											Present		Present					Present										Present		Present
SRR9260665	ND	SRR9260665	ND	ND	2019	16-60	M	ND	1	5	Yes	35	43	43	43	1189	Yes		Present											Present		Present				Present	Present										Present		Present
SRR9260899	ND	SRR9260899	ND	ND	2019	16-60	M	ND	1	5	Yes	35	43	43	43	1189	Yes		Present											Present		Present				Present	Present										Present	Present	Present
SRR9306489	ND	SRR9306489	ND	ND	2019	< 16	M	None	3	ND	No	78	324	664	1007	1687	Yes		Present											Present						Present	Present		Present								Present		Present
SRR9616447	ND	SRR9616447	ND	ND	2019	16-60	M	ND	1	5	Yes	35	43	43	43	1189	Yes		Present											Present		Present				Present	Present										Present		Present
SRR9661196	ND	SRR9661196	ND	ND	2019	16-60	M	None	1	5	Yes	35	43	43	43	1189	Yes		Present											Present		Present					Present										Present		Present
SRR9661221	ND	SRR9661221	ND	ND	2019	16-60	M	ND	4	ND	No	90	429	917	1317	1684	Yes		Present											Present		Present					Present							Present			Present	Present	Present
SRR9678933	ND	SRR9678933	ND	ND	2019	16-60	M	ND	1	5	Yes	35	43	43	43	1189	Yes		Present											Present		Present					Present										Present		Present
SRR9719231	ND	SRR9719231	ND	ND	2019	> 60	M	Africa	2	ND	No	19	23	882	1332	1702	Yes		Present											Present		Present				Present	Present										Present		Present
SRR9719238	ND	SRR9719238	ND	ND	2019	16-60	M	ND	1	5	Yes	35	43	43	43	1189	Yes		Present											Present		Present				Present	Present										Present		Present
SRR9826931	ND	SRR9826931	ND	ND	2019	16-60	M	ND	1	5	Yes	35	43	43	43	1189	Yes		Present											Present		Present				Present	Present										Present	Present	Present
SRR9836895	ND	SRR9836895	ND	ND	2019	16-60	M	Africa	2	ND	No	19	23	53	1336	1708	Yes		Present					Present	Present					Present		Present				Present	Present				Present						Present		Present
SRR9886011	ND	SRR9886011	ND	ND	2019	16-60	M	ND	1	5	Yes	35	43	43	43	1189	Yes		Present											Present		Present				Present	Present										Present	Present	Present
SRR9886070	ND	SRR9886070	ND	ND	2019	16-60	M	ND	1	5	Yes	35	43	43	43	1189	Yes		Present											Present		Present					Present										Present	Present	Present
SRR7223045	ND	SRR7223045	ND	ND	2018	< 16	F	Africa	4	ND	No	20	271	505	780	970	Yes													Present						Present											Present		Present
SRR9886109	ND	SRR9886109	ND	ND	2019	16-60	M	ND	1	5	Yes	35	43	43	43	1189	Yes		Present											Present		Present					Present										Present	Present	Present
SRR9967812	ND	SRR9967812	ND	ND	2019	16-60	M	ND	1	1	No	35	43	43	43	1305	Yes		Present											Present		Present				Present	Present										Present	Present	Present
SRR9973700	ND	SRR9973700	ND	ND	2019	16-60	M	ND	4	ND	No	90	429	917	1317	1684	Yes		Present											Present		Present				Present	Present							Present			Present	Present	Present
SRR10874273	ND	SRR10874273	ND	ND	2020	> 60	M	None	1	5	Yes	35	43	43	43	1189	Yes		Present											Present		Present					Present										Present		Present
SRR10915000	ND	SRR10915000	ND	ND	2020	16-60	M	ND	1	1	No	35	43	43	43	1305	Yes		Present											Present		Present		Present		Present	Present										Present	Present	Present
SRR10915019	ND	SRR10915019	ND	ND	2020	16-60	M	None	1	5	Yes	35	43	43	43	1189	Yes		Present											Present		Present					Present										Present		Present
SRR10424229	ND	SRR10424229	ND	ND	2019	16-60	F	South America	4	ND	No	90	429	917	1410	1809	Yes		Present											Present		Present					Present										Present		Present
SRR10962097	ND	SRR10962097	ND	ND	2020	16-60	M	ND	1	5	Yes	35	43	43	43	1189	Yes		Present											Present		Present					Present										Present	Present	Present
SRR10962111	ND	SRR10962111	ND	ND	2020	16-60	M	ND	1	5	Yes	35	43	43	43	1189	Yes		Present											Present		Present				Present	Present										Present		Present
SRR10962239	ND	SRR10962239	ND	ND	2020	16-60	M	None	1	5	Yes	35	43	43	43	1189	Yes		Present											Present		Present					Present										Present		Present
SRR12005310	ND	SRR12005310	ND	ND	2020	16-60	F	ND	4	ND	No	90	429	917	1317	1684	Yes		Present											Present		Present					Present							Present			Present		Present
SRR10997087	ND	SRR10997087	ND	ND	2020	16-60	M	ND	1	5	Yes	35	43	43	43	1189	Yes		Present											Present		Present					Present										Present		Present
SRR11035195	ND	SRR11035195	ND	ND	2020	16-60	M	ND	1	5	Yes	35	43	43	43	1189	Yes		Present											Present		Present				Present	Present										Present		Present
SRR11041500	ND	SRR11041500	ND	ND	2020	> 60	M	ND	1	5	Yes	35	43	43	43	1189	Yes		Present											Present		Present				Present	Present										Present		Present
SRR11041537	ND	SRR11041537	ND	ND	2020	16-60	M	None	1	5	Yes	35	43	43	43	1189	Yes		Present											Present		Present				Present	Present										Present		Present
SRR11068389	ND	SRR11068389	ND	ND	2020	16-60	M	None	4	ND	No	90	429	917	1317	1684	Yes		Present											Present		Present				Present	Present							Present			Present	Present	Present
SRR11096691	ND	SRR11096691	ND	ND	2020	16-60	M	ND	1	5	Yes	35	43	43	43	1189	Yes		Present											Present		Present				Present	Present										Present	Present	Present
SRR11096698	ND	SRR11096698	ND	ND	2020	16-60	M	ND	1	5	Yes	35	43	43	43	1189	Yes		Present											Present		Present					Present										Present	Present	Present
SRR11180167	ND	SRR11180167	ND	ND	2020	16-60	M	ND	1	5	Yes	35	43	43	43	1189	Yes		Present											Present		Present				Present	Present										Present		Present
SRR11195335	ND	SRR11195335	ND	ND	2020	16-60	M	Europe	1	5	Yes	35	43	43	43	1189	Yes		Present											Present		Present				Present	Present										Present		Present
SRR11206372	ND	SRR11206372	ND	ND	2020	16-60	M	ND	1	5	Yes	35	43	43	43	1189	Yes		Present											Present		Present					Present										Present		Present
SRR11206400	ND	SRR11206400	ND	ND	2020	16-60	M	Africa	2	ND	No	19	23	53	1489	1915	Yes		Present					Present	Present					Present		Present				Present	Present				Present						Present		Present
SRR11215160	ND	SRR11215160	ND	ND	2020	< 16	M	ND	3	ND	No	78	324	733	1062	1921	Yes		Present										Present	Present						Present	Present		Present								Present		Present
SRR11215200	ND	SRR11215200	ND	ND	2020	16-60	M	ND	1	5	Yes	35	43	43	43	1189	Yes		Present											Present		Present					Present										Present		Present
SRR8405060	ND	SRR8405060	ND	ND	2018	16-60	F	Asia	5	ND	No	21	25	881	1246	1565	Yes		Present					Present	Present					Present		Present					Present		Present								Present		Present
SRR11215233	ND	SRR11215233	ND	ND	2020	16-60	M	Africa	2	ND	No	19	23	53	1489	1915	Yes		Present					Present	Present					Present		Present				Present	Present				Present						Present		Present
SRR11361008	ND	SRR11361008	ND	ND	2020	> 60	M	Africa	2	ND	No	18	462	1006	1502	1940	Yes							Present	Present					Present						Present					Present						Present		Present
SRR10527343	ND	SRR10527343	ND	ND	2019	16-60	F	Yes,destination unknown	5	ND	No	21	447	964	1415	1821	Yes		Present					Present	Present					Present		Present					Present		Present								Present		Present
SRR11361744	ND	SRR11361744	ND	ND	2020	> 60	M	ND	1	5	Yes	35	43	43	43	1189	Yes		Present											Present		Present					Present										Present		Present
SRR8754021	ND	SRR8754021	ND	ND	2019	16-60	F	Asia	5	ND	No	21	25	881	1246	1621	Yes		Present					Present	Present					Present		Present					Present		Present								Present		Present
SRR10971436	ND	SRR10971436	ND	ND	2020	< 16	F	ND	5	ND	No	21	25	988	1466	1887	Yes		Present					Present	Present					Present		Present				Present	Present		Present								Present		Present
SRR11361813	ND	SRR11361813	ND	ND	2020	16-60	M	ND	1	5	Yes	35	43	43	43	1189	Yes		Present											Present		Present				Present	Present										Present		Present
SRR11442271	ND	SRR11442271	ND	ND	2020	16-60	M	ND	1	5	Yes	35	43	43	43	1189	Yes		Present											Present		Present				Present	Present										Present		Present
SRR11442291	ND	SRR11442291	ND	ND	2020	16-60	M	Europe	1	5	Yes	35	43	43	43	1189	Yes		Present											Present		Present				Present	Present										Present		Present
SRR11442295	ND	SRR11442295	ND	ND	2020	> 60	M	ND	1	5	Yes	35	43	43	43	1189	Yes		Present											Present		Present					Present										Present		Present
SRR11479164	ND	SRR11479164	ND	ND	2020	16-60	M	ND	1	5	Yes	35	43	43	43	1189	Yes		Present											Present		Present					Present										Present		Present
SRR11488772	ND	SRR11488772	ND	ND	2020	> 60	M	Africa	2	ND	No	19	463	1009	1507	1948	Yes		Present					Present	Present					Present		Present				Present	Present				Present						Present		Present
SRR11514732	ND	SRR11514732	ND	ND	2020	> 60	M	None	1	5	Yes	35	43	43	43	1189	Yes		Present											Present		Present					Present										Present		Present
SRR11657089	ND	SRR11657089	ND	ND	2020	16-60	M	ND	1	5	Yes	35	43	43	43	1189	Yes		Present											Present		Present					Present										Present	Present	Present
SRR7184273	ND	SRR7184273	ND	ND	2017	16-60	F	None	7	ND	No	66	224	381	576	681	Yes						Present							Present						Present											Present		Present
SRR7230215	ND	SRR7230215	ND	ND	2018	16-60	F	North America	7	ND	No	71	278	519	802	1004	Yes						Present							Present						Present											Present		Present
SRR11832237	ND	SRR11832237	ND	ND	2020	16-60	M	ND	1	5	Yes	35	43	43	43	1189	Yes		Present											Present		Present				Present	Present										Present		Present
SRR11832242	ND	SRR11832242	ND	ND	2020	16-60	M	ND	1	5	Yes	35	43	43	43	1189	Yes		Present											Present		Present				Present	Present										Present		Present
SRR11832244	ND	SRR11832244	ND	ND	2020	16-60	M	None	1	5	Yes	35	43	43	43	1189	Yes		Present											Present		Present					Present										Present		Present
SRR11836030	ND	SRR11836030	ND	ND	2020	16-60	M	None	1	5	Yes	35	43	43	43	1189	Yes		Present											Present		Present					Present										Present		Present
SRR11856686	ND	SRR11856686	ND	ND	2020	16-60	M	ND	1	5	Yes	35	43	43	43	1189	Yes		Present											Present		Present				Present	Present										Present		Present
SRR11885022	ND	SRR11885022	ND	ND	2020	16-60	M	None	1	5	Yes	35	43	43	43	1189	Yes		Present											Present		Present					Present										Present		Present
SRR11936990	ND	SRR11936990	ND	ND	2020	16-60	M	ND	1	5	Yes	35	43	43	43	1189	Yes		Present											Present		Present					Present										Present		Present
SRR11937150	ND	SRR11937150	ND	ND	2020	16-60	M	None	1	5	Yes	35	43	43	43	1189	Yes		Present											Present		Present					Present										Present		Present
SRR12005309	ND	SRR12005309	ND	ND	2020	16-60	M	ND	1	5	Yes	35	43	43	43	1189	Yes		Present											Present		Present				Present	Present										Present		Present
SRR12010339	ND	SRR12010339	ND	ND	2020	16-60	M	ND	1	5	Yes	35	43	43	43	1189	Yes		Present											Present		Present				Present	Present										Present	Present	Present
SRR12010387	ND	SRR12010387	ND	ND	2020	16-60	M	ND	1	5	Yes	35	43	43	43	1189	Yes		Present											Present		Present				Present	Present										Present		Present
SRR12091836	ND	SRR12091836	ND	ND	2020	16-60	M	ND	1	5	Yes	35	43	43	43	1189	Yes		Present											Present		Present					Present										Present		Present
SRR12091840	ND	SRR12091840	ND	ND	2020	< 16	M	ND	1	5	Yes	35	43	43	43	1189	Yes		Present											Present		Present				Present	Present										Present		Present
SRR12109940	ND	SRR12109940	ND	ND	2020	16-60	M	ND	1	5	Yes	35	43	43	43	1189	Yes		Present											Present		Present					Present										Present		Present
SRR12145925	ND	SRR12145925	ND	ND	2020	> 60	U	ND	1	5	Yes	35	43	43	43	1189	Yes		Present											Present		Present					Present										Present		Present
SRR12175200	ND	SRR12175200	ND	ND	2020	16-60	M	ND	1	5	Yes	35	43	43	43	1189	Yes		Present											Present		Present					Present										Present		Present
SRR12200418	ND	SRR12200418	ND	ND	2020	16-60	M	ND	4	ND	No	90	429	917	1317	1684	Yes		Present											Present		Present					Present							Present			Present		Present
SRR12346042	ND	SRR12346042	ND	ND	2020	16-60	M	None	1	5	Yes	35	43	43	43	1189	Yes		Present											Present		Present					Present										Present	Present	Present
SRR12354740	ND	SRR12354740	ND	ND	2020	16-60	M	ND	1	5	Yes	35	43	43	43	1189	Yes		Present											Present		Present					Present										Present		Present
SRR12415954	ND	SRR12415954	ND	ND	2020	16-60	M	ND	1	5	Yes	35	43	43	43	1189	Yes		Present											Present		Present					Present										Present		Present
SRR12450162	ND	SRR12450162	ND	ND	2020	16-60	M	None	6	ND	Yes	35	43	43	43	1189	Yes		Present					Present	Present					Present		Present					Present		Present								Present		Present
SRR12457665	ND	SRR12457665	ND	ND	2020	16-60	M	None	1	5	Yes	35	43	43	43	1189	Yes		Present											Present		Present					Present										Present		Present
SRR12470239	ND	SRR12470239	ND	ND	2020	16-60	M	ND	1	5	Yes	35	43	43	43	1189	Yes		Present											Present		Present				Present	Present										Present		Present
SRR12598696	ND	SRR12598696	ND	ND	2020	16-60	M	ND	1	5	No	35	43	43	43	1969	Yes		Present											Present		Present					Present										Present		Present
SRR12622145	ND	SRR12622145	ND	ND	2020	16-60	M	ND	1	5	Yes	35	43	43	43	1189	Yes		Present											Present		Present				Present	Present										Present		Present
SRR12625828	ND	SRR12625828	ND	ND	2020	16-60	M	ND	4	ND	No	90	429	917	1317	1684	Yes		Present											Present		Present					Present							Present			Present		Present
SRR12630748	ND	SRR12630748	ND	ND	2020	> 60	M	None	1	5	Yes	35	43	43	43	1189	Yes		Present											Present		Present				Present	Present										Present		Present
SRR12630753	ND	SRR12630753	ND	ND	2020	16-60	M	Asia	1	5	Yes	35	43	43	43	1189	Yes		Present											Present		Present					Present										Present		Present
SRR12630754	ND	SRR12630754	ND	ND	2020	16-60	M	ND	1	5	Yes	35	43	43	43	1189	Yes		Present											Present		Present				Present	Present										Present		Present
SRR12672098	ND	SRR12672098	ND	ND	2020	16-60	M	ND	1	5	Yes	35	43	43	43	1189	Yes		Present											Present		Present					Present										Present	Present	Present
SRR12672114	ND	SRR12672114	ND	ND	2020	16-60	M	ND	4	ND	No	90	429	917	1317	1684	Yes		Present											Present		Present				Present	Present							Present			Present		Present
SRR12683895	ND	SRR12683895	ND	ND	2020	16-60	M	ND	1	5	Yes	35	43	43	43	1189	Yes		Present											Present		Present				Present	Present										Present		Present
SRR12683897	ND	SRR12683897	ND	ND	2020	16-60	M	ND	1	5	Yes	35	43	43	43	1189	Yes		Present											Present		Present				Present	Present										Present		Present
SRR12683901	ND	SRR12683901	ND	ND	2020	16-60	M	ND	1	5	Yes	35	43	43	43	1189	Yes		Present											Present		Present				Present	Present										Present		Present
SRR12743036	ND	SRR12743036	ND	ND	2020	16-60	M	ND	1	5	Yes	35	43	43	43	1189	Yes		Present											Present		Present				Present	Present										Present		Present
SRR12762080	ND	SRR12762080	ND	ND	2020	16-60	M	ND	1	5	Yes	35	43	43	43	1189	Yes		Present											Present		Present				Present	Present										Present		Present
SRR12768334	ND	SRR12768334	ND	ND	2020	16-60	M	ND	1	5	Yes	35	43	43	43	1189	Yes		Present											Present		Present				Present	Present										Present		Present
SRR12803179	ND	SRR12803179	ND	ND	2020	16-60	M	ND	1	5	Yes	35	43	43	43	1189	Yes		Present											Present		Present				Present	Present										Present		Present
SRR12826290	ND	SRR12826290	ND	ND	2020	16-60	M	ND	1	5	Yes	35	43	43	43	1189	Yes		Present											Present		Present					Present										Present		Present
SRR12826320	ND	SRR12826320	ND	ND	2020	16-60	M	ND	1	5	Yes	35	43	43	43	1189	Yes		Present											Present		Present					Present										Present		Present
SRR12826321	ND	SRR12826321	ND	ND	2020	> 60	M	ND	4	ND	No	90	429	917	1317	1684	Yes		Present											Present		Present					Present							Present			Present		Present
SRR12841099	ND	SRR12841099	ND	ND	2020	16-60	M	ND	1	5	Yes	35	43	43	43	1189	Yes		Present											Present		Present					Present										Present		Present
SRR12958967	ND	SRR12958967	ND	ND	2020	> 60	M	ND	1	5	Yes	35	43	43	43	1189	Yes		Present											Present		Present					Present										Present		Present
SRR12963013	ND	SRR12963013	ND	ND	2020	16-60	M	ND	1	5	Yes	35	43	43	43	1189	Yes		Present											Present		Present				Present	Present										Present		Present
SRR13049236	ND	SRR13049236	ND	ND	2020	16-60	M	ND	1	5	Yes	35	43	43	43	1189	Yes		Present											Present		Present				Present	Present										Present		Present
SRR13057898	ND	SRR13057898	ND	ND	2020	16-60	M	ND	1	5	Yes	35	43	43	43	1189	Yes		Present											Present		Present					Present										Present		Present
SRR13153600	ND	SRR13153600	ND	ND	2020	16-60	M	ND	1	5	Yes	35	43	43	43	1189	Yes		Present											Present		Present				Present	Present										Present		Present
SRR13168771	ND	SRR13168771	ND	ND	2020	16-60	M	ND	4	ND	No	90	429	917	1317	1684	Yes		Present											Present		Present				Present	Present							Present			Present		Present
SRR13202279	ND	SRR13202279	ND	ND	2020	16-60	M	ND	1	5	Yes	35	43	43	43	1189	Yes		Present											Present		Present				Present	Present										Present		Present
SRR13278381	ND	SRR13278381	ND	ND	2020	16-60	M	ND	4	ND	No	90	429	917	1317	1684	Yes		Present											Present		Present					Present							Present			Present		Present
SRR13310633	ND	SRR13310633	ND	ND	2020	16-60	M	None	1	5	Yes	35	43	43	43	1189	Yes		Present											Present		Present				Present	Present										Present		Present
SRR7221188	ND	SRR7221188	ND	ND	2016	16-60	M	Europe	ND	ND	No	ND	ND	ND	ND	ND	No	ND	ND	ND	ND	ND	ND	ND	ND	ND	ND	ND	ND	ND	ND	ND	ND	ND	ND	ND	ND	ND	ND	ND	ND	ND	ND	ND	ND	ND	ND	ND	ND
SRR7367215	ND	SRR7367215	ND	ND	2016	16-60	M	None	ND	ND	No	ND	ND	ND	ND	ND	Yes						Present	Present	Present					Present				Present		Present										Present	Present		Present
SRR7286487	ND	SRR7286487	ND	ND	2017	16-60	M	None	ND	ND	No	ND	ND	ND	ND	ND	Yes		Present											Present		Present					Present										Present		Present
SRR7223059	ND	SRR7223059	ND	ND	2018	16-60	M	ND	ND	ND	No	ND	ND	ND	ND	ND	Yes							Present	Present					Present						Present					Present						Present		Present
SRR7223155	ND	SRR7223155	ND	ND	2018	< 16	M	ND	ND	ND	No	ND	ND	ND	ND	ND	Yes		Present											Present						Present	Present		Present								Present		Present
SRR7401611	ND	SRR7401611	ND	ND	2018	16-60	M	ND	ND	ND	No	ND	ND	ND	ND	ND	Yes		Present										Present	Present		Present					Present		Present								Present		Present
SRR7522851	ND	SRR7522851	ND	ND	2018	16-60	M	ND	ND	ND	No	ND	ND	ND	ND	ND	Yes													Present						Present											Present		Present
SRR7588731	ND	SRR7588731	ND	ND	2018	16-60	M	Asia	ND	ND	No	ND	ND	ND	ND	ND	No	ND	ND	ND	ND	ND	ND	ND	ND	ND	ND	ND	ND	ND	ND	ND	ND	ND	ND	ND	ND	ND	ND	ND	ND	ND	ND	ND	ND	ND	ND	ND	ND
SRR7588733	ND	SRR7588733	ND	ND	2018	16-60	M	ND	ND	ND	No	ND	ND	ND	ND	ND	Yes		Present					Present	Present					Present		Present				Present	Present				Present						Present		Present
SRR10605697	ND	SRR10605697	ND	ND	2019	16-60	M	ND	ND	ND	No	ND	ND	ND	ND	ND	Yes																			Present		Present											Present
SRR7184349	ND	SRR7184349	ND	ND	2017	16-60	F	Asia	ND	ND	No	ND	ND	ND	ND	ND	Yes		Present											Present		Present					Present		Present								Present		Present
SRR7186918	ND	SRR7186918	ND	ND	2017	< 16	F	Asia	ND	ND	No	ND	ND	ND	ND	ND	Yes		Present											Present		Present				Present	Present		Present								Present		Present
SRR7186970	ND	SRR7186970	ND	ND	2017	> 60	F	ND	ND	ND	No	ND	ND	ND	ND	ND	Yes		Present					Present	Present				Present	Present		Present				Present	Present		Present								Present		Present
SRR7191431	ND	SRR7191431	ND	ND	2017	> 60	F	Asia	ND	ND	No	ND	ND	ND	ND	ND	Yes		Present											Present		Present				Present	Present										Present		Present
SRR8419055	ND	SRR8419055	ND	ND	2018	16-60	F	Africa	ND	ND	No	ND	ND	ND	ND	ND	Yes		Present					Present	Present					Present		Present				Present	Present				Present						Present		Present
[truncated: 52 more columns]
